# Supplementary material for: Two conserved transcription factors and a histone deubiquitinase regulate the mitochondrial unfolded protein response and longevity interacting with insulin signalling
Source: Research Square preprint supplement (doi:10.21203/rs.3.rs-3337719/v2), 2025-12-15
Supplement: Supplementary file 1 [file 27fba45221179bc6a9989777.xlsx]

## Sheet: phb-1RNAi - Reduced UPRmt
Columna1	GeneID	Name	LFC 1st rep	P_val 1s rep	LFC 2st rep	P_val 2s rep	mean LFC	mean P_val
366	T24C4.6	zer-1	-0.953006	0.000109114	-0.211163	0.0460797	-0.582085	0.0230944
365	C09H6.3	mau-2	-0.355081	0.0518981	-0.813063	2.54655e-07	-0.584072	0.0259492
364	R07B7.11	gana-1	-0.65395	3.70338e-09	-0.518926	2.20598e-09	-0.586438	2.95468e-09
363	T01B7.8	T01B7.8	-0.586595	0.00192918			-0.586595	0.00192918
362	Y32G9A_367.a	gst-37	-0.297716	0.00512881	-0.875847	7.98625e-09	-0.586781	0.00256441
361	K04E7.2	pept-1			-0.588234	8.89402e-08	-0.588234	8.89402e-08
360	F11C1.6	nhr-25			-0.590187	7.14385e-06	-0.590187	7.14385e-06
359	R12E2.2	suco-1	-0.727276	1.77663e-08	-0.459838	1.33748e-07	-0.593557	7.5757e-08
358	ZK121.c	ZK121.c	-0.671366	5.90102e-11	-0.518789	1.51461e-05	-0.595077	7.57308e-06
357	T05C12.10	qua-1	-0.749493	0.00265376	-0.440987	3.81384e-05	-0.59524	0.00134595
356	C32F10.1	obr-4			-0.602207	0.0033035	-0.602207	0.0033035
355	W02A11.1	W02A11.1	-1.48993	9.04498e-07	0.274857	0.00753682	-0.607538	0.00376886
354	Y62E10A.d	rla-2	-0.233853	0.0046365	-0.996538	3.76938e-14	-0.615196	0.00231825
353	F09B12.3	F09B12.3	-0.615609	0.0145926			-0.615609	0.0145926
352	Y50D4C_15.a	Y50D4C_15.a	-0.469613	1.87439e-05	-0.76216	7.41433e-08	-0.615887	9.40903e-06
351	F14E5.2	F14E5.2	-0.652169	0.000137171	-0.58405	0.000317496	-0.618109	0.000227334
350	Y59A8A.b	gck-3	-0.420678	1.32265e-05	-0.816235	6.54845e-18	-0.618457	6.61325e-06
349	ZK858.4	mel-26	-0.690041	0.000173062	-0.549443	1.77034e-07	-0.619742	8.66194e-05
348	H37N21.1	hpo-11	-0.625298	1.02434e-05			-0.625298	1.02434e-05
347	R12B2.5	mdt-15	-0.341352	1.40996e-05	-0.909431	1.49688e-11	-0.625392	7.04981e-06
346	B0496.8	tes-1	-0.784171	2.08059e-10	-0.467082	0.0271158	-0.625627	0.0135579
345	T10H9.3	syx-18			-0.629468	5.35129e-06	-0.629468	5.35129e-06
344	ZK783.4	baz-2	-0.283994	0.00520292	-0.976024	1.39758e-06	-0.630009	0.00260216
343	ZC328.3	ZC328.3	-0.230109	0.0646298	-1.0322	3.24206e-06	-0.631152	0.0323165
342	C56C10.8	icd-1	0.406391	0.000343768	-1.66901	3.37514e-24	-0.631312	0.000171884
341	C43G2.1	paqr-1	-0.632896	9.97392e-05			-0.632896	9.97392e-05
340	F26H9.8	uggt-2	-1.00037	0.000187844	-0.2762	0.013885	-0.638285	0.00703641
339	T03F1.10	clec-53	-0.80997	7.04712e-07	-0.469462	3.37604e-08	-0.639716	3.69236e-07
338	F26E4.8	tba-1	-1.46467	2.06755e-13	0.184373	0.0633025	-0.640147	0.0316513
337	C37A2.7	C37A2.7	-0.736244	1.10485e-06	-0.545925	4.79444e-07	-0.641084	7.9215e-07
336	E02D9.1	E02D9.1	-1.04832	9.20848e-05	-0.239638	0.051015	-0.643979	0.0255536
335	T05A12.2	tre-2	-0.649258	0.00193101			-0.649258	0.00193101
334	K02F2.1	dpf-3	-0.736567	5.35356e-05	-0.562447	9.41509e-07	-0.649507	2.72385e-05
333	W06D4.6	rad-54	-1.00903	2.36981e-06	-0.292928	0.00563405	-0.650977	0.00281821
332	C06E7.3	sams-4	-0.652251	0.000525943			-0.652251	0.000525943
331	C11H1.3	C11H1.3	-0.652647	0.00568284			-0.652647	0.00568284
330	C01G5.8	fan-1	-0.656505	0.000139255			-0.656505	0.000139255
329	F46C8.6	dpy-7	-0.56136	0.0190033	-0.753272	3.12568e-07	-0.657316	0.00950183
328	F18C12.2	rme-8	-0.843976	0.00102163	-0.475994	9.75228e-07	-0.659985	0.000511305
327	F38A6.1	pha-4	-0.620948	0.000249018	-0.706224	1.65953e-06	-0.663586	0.000125339
326	T25G3.1	T25G3.1	-0.467612	0.0102573	-0.863839	1.90513e-09	-0.665725	0.00512864
325	F10C2.4	F10C2.4	-0.582107	0.000107472	-0.754406	6.58968e-08	-0.668256	5.3769e-05
324	F14F11.1	shw-1			-0.673571	3.77044e-06	-0.673571	3.77044e-06
323	C04G2.6	dis-3	-0.97013	1.5863e-18	-0.385871	0.0286233	-0.678001	0.0143117
322	F20D1.1	F20D1.1	-0.683353	0.0144184			-0.683353	0.0144184
321	F52D10.3	ftt-2	-0.684735	1.44288e-08			-0.684735	1.44288e-08
320	C01G5.2	prg-2	-0.692904	0.00191567			-0.692904	0.00191567
319	M03D4.1	zen-4	-0.69354	9.65223e-07			-0.69354	9.65223e-07
318	C34B4.1	max-1	-0.760608	4.74398e-09	-0.652569	1.16754e-06	-0.706588	5.86141e-07
317	ZC581.1	nekl-2	-0.622882	2.12524e-06	-0.801111	4.84952e-05	-0.711997	2.53102e-05
316	W03F8.2	W03F8.2	-0.712162	0.000509635			-0.712162	0.000509635
315	B0336.2	arf-1.2	-0.651356	3.37721e-07	-0.773304	7.53494e-10	-0.71233	1.69237e-07
314	Y43F8C.7	Y43F8C.7	-0.801246	6.24245e-07	-0.625972	1.16733e-05	-0.713609	6.14877e-06
313	F39H11.2	tlf-1	-0.755343	9.20848e-05	-0.679674	5.17355e-15	-0.717508	4.60424e-05
312	Y80D3B.c	cyp-42A1	-0.5212	4.33955e-05	-0.914345	2.338e-05	-0.717772	3.33877e-05
311	R06C1.1	hda-3	-1.89065	5.48113e-08	0.454776	1.61868e-06	-0.717937	8.36744e-07
310	C14B9.4	plk-1	-0.709582	6.46515e-12	-0.729137	1.14362e-07	-0.71936	5.71843e-08
309	F27D4.4	F27D4.4	-1.14358	4.53858e-06	-0.299968	0.0103023	-0.721776	0.00515341
308	Y37E11A_93.e	smgl-2	-0.584196	7.66043e-07	-0.859912	2.17344e-09	-0.722054	3.84108e-07
307	F54F2.1	pat-2	-0.328413	0.0555894	-1.11691	1.28056e-13	-0.722661	0.0277947
306	R07E5.14	rnp-4	-0.964523	3.35741e-16	-0.489189	6.14875e-06	-0.726856	3.07437e-06
305	W04C9.1	haf-4	-0.619276	2.36678e-05	-0.842756	3.03958e-17	-0.731016	1.18339e-05
304	R144.2	pcf-11	-0.803404	3.69295e-08	-0.685865	5.56724e-13	-0.744634	1.8465e-08
303	F18C12.3	F18C12.3	-0.965701	0.000128088	-0.542714	1.54376e-10	-0.754208	6.40441e-05
302	R09B3.5	mag-1			-0.755181	1.93971e-09	-0.755181	1.93971e-09
301	C09G5.6	bli-1	-1.69725	4.47702e-13	0.182409	0.0785838	-0.757419	0.0392919
300	B0273.2	puf-7	-0.757987	1.2125e-05			-0.757987	1.2125e-05
299	K02B2.1	pfkb-1.2	-0.76123	0.00121817			-0.76123	0.00121817
298	F49C12.8	rpn-7	-0.761752	2.40733e-08			-0.761752	2.40733e-08
297	T01D3.2	hlh-34	-1.01428	1.22198e-09	-0.511506	1.2662e-05	-0.762892	6.33162e-06
296	C56G2.6	let-767	-0.999341	4.4981e-13	-0.533729	8.96927e-06	-0.766535	4.48464e-06
295	Y71H10B.1	Y71H10B.1	-0.899651	2.35029e-08	-0.642162	5.7709e-08	-0.770907	4.0606e-08
294	C03C10.3	rnr-2	-0.889213	4.56901e-07	-0.671828	7.04969e-10	-0.780521	2.28803e-07
293	K08E4.1	spt-5	-0.576186	2.40733e-08	-0.989787	8.58033e-13	-0.782986	1.20371e-08
292	F37C12.1	F37C12.1	-0.62733	3.25005e-13	-0.951572	9.42394e-11	-0.789451	4.72822e-11
291	C52E4.6	cyl-1	-0.895458	1.6296e-13	-0.69302	1.40115e-10	-0.794239	7.01391e-11
290	Y38F2A_5743.e	vha-3	0.866715	1.38654e-13	-2.45752	1.30662e-24	-0.795403	6.93268e-14
289	ZK632.1	mcm-6	-0.887563	1.59989e-09	-0.706108	1.6747e-06	-0.796835	8.38148e-07
288	C08B11.5	sap-49			-0.800057	1.95823e-20	-0.800057	1.95823e-20
287	K07A1.12	lin-53			-0.80931	3.49565e-09	-0.80931	3.49565e-09
286	Y48B6A.2	rpl-43	-1.17057	9.5289e-20	-0.45374	1.68348e-05	-0.812152	8.41741e-06
285	F45F2.13	his-6	-0.653059	5.32409e-14	-0.975037	1.32797e-06	-0.814048	6.63985e-07
284	C12C8.3	lin-41			-0.815212	3.34758e-15	-0.815212	3.34758e-15
283	VF36H2L.1	aph-1	-1.47422	0.00040918	-0.158407	0.0561071	-0.816313	0.0282581
282	F57B10.5	F57B10.5	-0.583229	0.000110244	-1.06965	1.34302e-08	-0.826438	5.51289e-05
281	F57B10.11	bag-1	-0.530978	4.0302e-06	-1.1444	7.2341e-12	-0.837687	2.01511e-06
280	K12H4.3	K12H4.3	-0.59828	3.22205e-11	-1.09492	5.00699e-20	-0.846599	1.61103e-11
279	ZK430.1	toe-1			-0.85018	1.70489e-14	-0.85018	1.70489e-14
278	F35H10.4	vha-5	-0.986236	2.78912e-20	-0.733897	1.6574e-11	-0.860067	8.28702e-12
277	Y80D3B.d	cyp-42A1	-0.860948	1.32882e-07			-0.860948	1.32882e-07
276	K06A5.6	acdh-3	0.599833	8.46059e-07	-2.3232	4.34568e-20	-0.861683	4.23029e-07
275	T22D1.2	T22D1.2	-0.861773	0.00124324			-0.861773	0.00124324
274	Y50E8.r	rin-1	-0.766501	0.000146344	-0.965928	2.49993e-11	-0.866215	7.31718e-05
273	ZK484.2	haf-9	-0.920209	2.07404e-05	-0.818906	1.03303e-13	-0.869558	1.03702e-05
272	K12H4.1	pros-1	-1.01058	3.57407e-11	-0.730638	1.63116e-07	-0.87061	8.15757e-08
271	F25G6.2	symk-1	-0.77351	1.46984e-09	-0.974815	3.48579e-12	-0.874163	7.36663e-10
270	C55B7.4	acdh-1			-0.879799	6.14976e-16	-0.879799	6.14976e-16
269	F25H5.6	mrpl-54	-1.25714	4.22624e-10	-0.515591	0.000104552	-0.886364	5.22762e-05
268	K08B4.1	lag-1	-0.889197	9.5827e-05			-0.889197	9.5827e-05
267	C01H6.5	nhr-23			-0.895124	3.2255e-12	-0.895124	3.2255e-12
266	Y63D3A.5	tfg-1			-0.896353	1.78054e-11	-0.896353	1.78054e-11
265	D2096.8	nap-1	-0.856548	2.16075e-20	-0.946399	3.88648e-15	-0.901473	1.94325e-15
264	C07G1.5	hgrs-1	-0.882696	6.91758e-21	-0.925542	1.9781e-11	-0.904119	9.89049e-12
263	C16A3.6	C16A3.6	-0.347857	4.95756e-05	-1.46506	9.20753e-23	-0.906456	2.47878e-05
262	C55B7.12	che-1			-0.907805	1.48381e-08	-0.907805	1.48381e-08
261	F46A9.5	skr-1	-1.41371	2.00298e-10	-0.421103	0.00176716	-0.917405	0.000883581
260	C05D11.10	mrps-17	-0.758415	1.8301e-09	-1.08025	7.00573e-13	-0.91933	9.15403e-10
259	C07A12.4	pdi-2	-1.321	2.64757e-05	-0.522785	0.000348079	-0.921892	0.000187277
258	C37A2.4	cye-1	-0.917459	0.00118013	-0.956694	1.65888e-14	-0.937077	0.000590066
257	Y39B6B.a	pro-3	-0.662237	1.88902e-05	-1.21368	7.8287e-10	-0.937957	9.44549e-06
256	C17H12.1	dyci-1	-0.939914	1.97355e-08			-0.939914	1.97355e-08
255	F49C12.13	vha-17	-0.25018	0.00340739	-1.63021	1.37177e-27	-0.940197	0.0017037
254	M88.6	pan-1	-1.11761	4.73053e-06	-0.763411	2.08059e-10	-0.940508	2.36537e-06
253	T27A3.2	usp-5	-1.03449	2.76799e-05	-0.860973	3.98195e-15	-0.947731	1.384e-05
252	Y65B4B_10.b	icd-2	-0.621211	1.0185e-08	-1.28171	3.57814e-26	-0.951458	5.0925e-09
251	F20B6.8	hpk-1	-1.33736	4.72268e-05	-0.597612	2.33122e-06	-0.967487	2.4779e-05
250	F17E9.10	his-32	-1.10556	1.25502e-13	-0.844196	5.62022e-09	-0.97488	2.81017e-09
249	Y47D3B.5	twk-31	-0.689204	3.93632e-19	-1.27506	5.36467e-26	-0.98213	1.96816e-19
248	C15H11.9	rrbs-1	-1.09408	1.71324e-12	-0.889511	1.42612e-15	-0.991796	8.57335e-13
247	C05G5.5	C05G5.5	-0.992487	0.0407193			-0.992487	0.0407193
246	K02D10.5	snap-29	-0.994541	1.57248e-18			-0.994541	1.57248e-18
245	C16A3.3	let-716	-0.277418	0.00118407	-1.72211	1.80785e-44	-0.999763	0.000592034
244	C39E9.11	C39E9.11	-0.794348	3.47697e-17	-1.21633	6.97292e-14	-1.00534	3.4882e-14
243	C38C10.2	slc-17.2	-0.883178	1.40498e-06	-1.13805	2.34195e-28	-1.01062	7.02491e-07
242	F37E3.1	ncbp-1	-1.1088	3.18643e-17	-0.956167	2.96104e-21	-1.03249	1.59336e-17
241	F25B4.6	hmgs-1	1.06055	3.54929e-17	-3.12822	3.5636e-48	-1.03384	1.77465e-17
240	Y71F9B_286.b	snr-7	-0.827542	7.60279e-11	-1.2842	7.52003e-22	-1.05587	3.80139e-11
239	K01C8.9	nst-1	-1.18752	2.27956e-18	-0.95907	1.79998e-14	-1.0733	9.00103e-15
238	D2085.3	D2085.3	-1.08659	1.77663e-12	-1.06477	1.91738e-15	-1.07568	8.89272e-13
237	Y110A7A.m	prp-31	-1.30786	0.00947007	-0.8449	4.22283e-14	-1.07638	0.00473503
236	H06I04.f	ubl-1	-1.34647	6.732e-17	-0.811823	1.49078e-05	-1.07915	7.4539e-06
235	K02B12.3	sec-12	-1.75592	7.3578e-10	-0.412172	5.44089e-05	-1.08405	2.72048e-05
234	K11D2.4	K11D2.4	-1.84715	2.84705e-05	-0.325919	0.00209704	-1.08654	0.00106275
233	F23F12.6	rpt-3	-1.08828	4.92925e-17			-1.08828	4.92925e-17
232	F57B10.1	let-607	-1.66761	1.5754e-15	-0.519217	0.00711535	-1.09342	0.00355768
231	C06A1.1	cdc-48.1	-1.85266	2.96979e-34	-0.343881	0.000865153	-1.09827	0.000432577
230	F38H4.9	let-92	-0.729123	8.2626e-14	-1.46962	2.25163e-17	-1.09937	4.13243e-14
229	C49A9.8	ugt-24	-1.10775	2.75862e-07			-1.10775	2.75862e-07
228	Y39B6B.j	asp-17	-0.631313	0.000396047	-1.59996	3.53931e-06	-1.11564	0.000199793
227	T19A6.3	T19A6.3	-1.18986	0.00135889	-1.04179	6.97811e-08	-1.11583	0.00067948
226	C28H8.11	tdo-2	-0.990089	2.39782e-19	-1.24498	1.84517e-07	-1.11753	9.22587e-08
225	Y41D4A_3457.a	npp-8	-0.444224	0.000100083	-1.82033	1.39368e-37	-1.13228	5.00414e-05
224	F48F7.1	alg-1	-1.6689	7.99115e-07	-0.605612	0.000163733	-1.13726	8.22659e-05
223	C16A3.8	thoc-2	-0.765405	5.58212e-21	-1.53212	4.00966e-25	-1.14876	2.79126e-21
222	Y41E3.4	qars-1	-0.546808	8.23978e-09	-1.75646	8.30016e-23	-1.15163	4.11989e-09
221	T26A8.4	T26A8.4	-0.91669	4.83961e-21	-1.38752	6.22028e-25	-1.1521	2.42012e-21
220	C47D12.6	tars-1	-1.71601	2.6824e-32	-0.59273	9.34441e-05	-1.15437	4.6722e-05
219	F26A3.1	F26A3.1	-1.16261	4.24573e-07	-1.16799	8.87205e-06	-1.1653	4.64831e-06
218	F53F4.11	F53F4.11	-1.23241	2.29812e-22	-1.12921	5.81718e-13	-1.18081	2.90859e-13
217	T23F2.1	bus-8			-1.19208	2.07955e-10	-1.19208	2.07955e-10
216	F17E9.9	his-34	-0.952231	8.79349e-11	-1.44489	4.3651e-14	-1.19856	4.39893e-11
215	R07G3.3	npp-21	-1.14703	1.59646e-18	-1.25903	2.34689e-28	-1.20303	7.98232e-19
214	B0350.2	unc-44	-1.22039	2.13782e-08			-1.22039	2.13782e-08
213	F52B5.6	rpl-25.2	-0.96561	4.20126e-06	-1.48083	2.20624e-19	-1.22322	2.10063e-06
212	F18E2.3	scc-3	-1.01754	3.06196e-10	-1.43072	1.07324e-16	-1.22413	1.53098e-10
211	C42D8.8	apl-1			-1.22785	1.53501e-16	-1.22785	1.53501e-16
210	T23G5.1	rnr-1	-0.480961	0.000880677	-2.00114	2.4184e-45	-1.24105	0.000440339
209	F55H2.2	vha-14	-1.07823	9.62709e-14	-1.40513	3.36641e-31	-1.24168	4.81355e-14
208	ZK328.5	npp-10	-0.611436	6.53261e-12	-1.873	4.53987e-30	-1.24222	3.26631e-12
207	ZK1014.1	nsf-1			-1.26774	2.41986e-17	-1.26774	2.41986e-17
206	C54C6.1	rpl-37			-1.28103	1.61185e-27	-1.28103	1.61185e-27
205	F55A12.8	nath-10	-1.30483	0.00927735	-1.28222	2.26587e-13	-1.29352	0.00463867
204	F56D2.7	ced-6	-1.13612	1.91738e-15	-1.47035	2.34972e-30	-1.30323	9.58688e-16
203	M01A10.3	tom-1	-2.31416	0.0011598	-0.302727	0.0163779	-1.30844	0.00876884
202	F36F2.3	rbpl-1	-1.64823	1.62207e-15	-0.969515	1.78546e-14	-1.30887	9.73831e-15
201	T21E12.4	dhc-1	-1.36961	2.01866e-11	-1.24954	1.40893e-11	-1.30957	1.71379e-11
200	T27F7.3	eif-1	-1.44408	4.06025e-42	-1.17839	3.10947e-27	-1.31124	1.55474e-27
199	D1014.3	snap-1	-1.32401	1.22878e-09			-1.32401	1.22878e-09
198	K02B2.5	rps-25	-1.32864	1.35858e-08			-1.32864	1.35858e-08
197	M03F4.7	calu-1	-1.70861	7.51818e-06	-0.961944	2.835e-14	-1.33528	3.75909e-06
196	F55C5.8	srpa-68	-1.34421	5.63197e-15			-1.34421	5.63197e-15
195	ZK1058.2	pat-3			-1.34698	2.99873e-28	-1.34698	2.99873e-28
194	T01G9.6	kin-10	-1.77722	5.12671e-09	-1.00564	1.1658e-06	-1.39143	5.85461e-07
193	T19B4.2	npp-7	-1.53073	2.69783e-19	-1.3281	1.44128e-26	-1.42941	1.34891e-19
192	Y106G6H.2	pab-1	-1.3209	1.0703e-14	-1.54724	1.04046e-23	-1.43407	5.3515e-15
191	D2092.3	acr-11	-1.95661	1.09407e-08	-0.94535	3.8428e-08	-1.45098	2.46843e-08
190	Y110A7A.j	pas-3	-1.85756	0.00246816	-1.11795	1.28226e-07	-1.48776	0.00123414
189	B0336.3	B0336.3	-1.42545	6.20435e-23	-1.55753	1.85057e-23	-1.49149	4.02746e-23
188	C53H9.2	C53H9.2	-2.18505	1.15045e-19	-0.815361	3.737e-15	-1.50021	1.86856e-15
187	C17H12.14	vha-8	-1.51019	4.00832e-37			-1.51019	4.00832e-37
186	Y54E10B_159.c	rpb-7	-1.2915	5.44794e-25	-1.73366	1.60725e-31	-1.51258	2.72397e-25
185	R05D11.3	ran-4	-1.63938	3.19623e-07	-1.39612	5.16092e-24	-1.51775	1.59811e-07
184	F09G2.4	cpsf-2	-0.75597	1.88397e-13	-2.35455	2.99922e-38	-1.55526	9.41985e-14
183	F40F11.2	mig-38	-1.48792	2.57345e-35	-1.67643	8.56061e-19	-1.58217	4.2803e-19
182	Y116A8C.35	uaf-2	-2.67101	3.70529e-46	-0.590547	0.000200811	-1.63078	0.000100406
181	F49C12.12	F49C12.12	-0.276825	0.00426451	-2.98546	9.24776e-22	-1.63114	0.00213226
180	F43D9.3	sly-1	-1.63584	7.95753e-46			-1.63584	7.95753e-46
179	EGAP7.1	dpy-3	-1.80253	3.10072e-38	-1.47158	2.76675e-17	-1.63705	1.38337e-17
178	Y110A7A.f	pas-3	-2.12583	0.00153075	-1.15004	6.63348e-14	-1.63793	0.000765376
177	F22D6.3	nars-1	-1.89813	9.5022e-31	-1.3842	1.26513e-11	-1.64117	6.32567e-12
176	Y41D4A_2768.a	npp-8	-0.901986	1.07827e-10	-2.41211	6.57695e-45	-1.65705	5.39137e-11
175	F46E10.1	acs-1	-1.65906	1.99633e-20			-1.65906	1.99633e-20
174	F46F11.5	vha-10			-1.66711	7.67055e-31	-1.66711	7.67055e-31
173	Y80D3A.a	wars-1	-2.06729	1.81025e-29	-1.27518	6.20885e-16	-1.67123	3.10443e-16
172	F54C9.1	iff-2	-1.7314	1.25482e-14	-1.61156	4.35799e-31	-1.67148	6.27408e-15
171	R07E4.6	kin-2			-1.67289	3.06239e-18	-1.67289	3.06239e-18
170	ZK121.b	glrx-21	-1.7185	1.08935e-14	-1.65204	9.24126e-21	-1.68527	5.44677e-15
169	Y38F2A_5743.i	vha-3	-1.49869	4.32717e-31	-1.90385	9.13723e-25	-1.70127	4.56862e-25
168	B0511.6	B0511.6	-2.4147	2.26853e-18	-1.01988	2.4314e-24	-1.71729	1.13427e-18
167	Y34D9A_152.a	vps-4	-1.70615	2.6996e-17	-1.74247	1.19101e-11	-1.72431	5.95507e-12
166	F29G9.3	aps-1	-1.72732	1.40258e-32			-1.72732	1.40258e-32
165	T21H3.3	cmd-1	-1.73432	1.3756e-16			-1.73432	1.3756e-16
164	C42C1.3	rpl-34	-0.803499	5.88359e-14	-2.66618	2.67629e-41	-1.73484	2.94179e-14
163	F54H12.6	eef-1B.1	-0.408536	3.57284e-07	-3.06532	9.17328e-53	-1.73693	1.78642e-07
162	D1007.12	rpl-24.1	-2.79003	1.64893e-55	-0.691762	2.50613e-11	-1.7409	1.25306e-11
161	F25D7.3	blmp-1	-1.41022	2.088e-11	-2.0822	1.66482e-27	-1.74621	1.044e-11
160	F57H12.1	arf-3	-1.75875	7.41848e-20	-1.7385	2.24751e-24	-1.74862	3.70935e-20
159	T11G6.1	hars-1	-0.911152	4.13635e-11	-2.58919	3.95898e-45	-1.75017	2.06817e-11
158	ZC101.2	unc-52	-3.11647	2.57848e-21	-0.384251	0.000171494	-1.75036	8.5747e-05
157	Y23H5A.7	cars-1	-2.34178	1.89671e-19	-1.16686	9.11738e-25	-1.75432	9.48361e-20
156	D2013.7	eif-3.F	-1.59956	2.58186e-20	-1.95357	2.27016e-32	-1.77656	1.29093e-20
155	C14B9.7	rpl-21	-0.577676	8.53028e-09	-3.03827	2.06452e-52	-1.80797	4.26514e-09
154	VW02B12L.1	vha-6	-2.62584	1.44155e-45	-1.00196	8.59442e-14	-1.8139	4.29721e-14
153	ZK669.3	ZK669.3			-1.81991	1.95812e-45	-1.81991	1.95812e-45
152	F55A3.3	F55A3.3			-1.84818	2.39324e-42	-1.84818	2.39324e-42
151	Y47D3A.c	Y47D3A.c	-0.407368	3.86432e-05	-3.30011	5.11423e-50	-1.85374	1.93216e-05
150	F57B9.6	inf-1	-1.4477	5.90087e-12	-2.34466	2.21557e-25	-1.89618	2.95043e-12
149	C52E4.3	snr-4	-1.86015	1.38078e-34	-1.97729	3.03469e-31	-1.91872	1.51804e-31
148	F18A1.5	rpa-1	-1.69618	5.68748e-30	-2.20644	1.56275e-41	-1.95131	2.84374e-30
147	C16A3.4	C16A3.4			-1.99485	7.01991e-38	-1.99485	7.01991e-38
146	M28.5	M28.5	-2.79948	9.15349e-40	-1.2246	2.11e-26	-2.01204	1.055e-26
145	F57B9.3	F57B9.3	-1.29327	2.13627e-27	-2.74125	6.68197e-27	-2.01726	4.40912e-27
144	F57B9.2	let-711	-1.53499	3.59054e-23	-2.5419	2.8645e-23	-2.03844	3.22752e-23
143	T08B2.9	fars-1	-2.71989	9.4479e-24	-1.43497	2.33444e-29	-2.07743	4.72396e-24
142	T08A11.2	sftb-1	-3.22475	2.0729e-19	-0.954438	2.34404e-10	-2.08959	1.17202e-10
141	Y38F2A_5743.f	vha-11	-2.16494	1.43069e-42	-2.07255	3.96994e-25	-2.11874	1.98497e-25
140	C01F1.3	C01F1.3	-1.7213	1.83196e-17	-2.52466	1.62766e-37	-2.12298	9.1598e-18
139	B0511.10	eif-3.E	-2.70085	6.99994e-26	-1.54677	2.23864e-23	-2.12381	1.12282e-23
138	W01D2.1	W01D2.1	-3.62783	1.63909e-21	-0.628382	1.24067e-11	-2.12811	6.20336e-12
137	ZK1010.1	ubq-2			-2.15961	1.76075e-21	-2.15961	1.76075e-21
136	C30B5.6	C30B5.6			-2.17132	8.22762e-25	-2.17132	8.22762e-25
135	F39B2.6	rps-26	-3.21794	1.98382e-60	-1.15384	7.86977e-13	-2.18589	3.93488e-13
134	Y57E12_242.c	mdt-6	-2.50538	1.03761e-19	-1.94787	2.52375e-31	-2.22662	5.18803e-20
133	ZK970.4	vha-9	-3.12256	2.57263e-41	-1.4241	1.41145e-27	-2.27333	7.05723e-28
132	W03G1.5	W03G1.5	-2.04396	2.49169e-27	-2.56489	1.74751e-47	-2.30442	1.24584e-27
131	T22F3.4	rpl-11.1	-1.45036	4.23639e-43	-3.25846	1.29408e-45	-2.35441	2.12466e-43
130	M7.1	let-70	-1.66262	1.70418e-28	-3.06269	1.29055e-44	-2.36265	8.52089e-29
129	F48E8.5	paa-1	-2.44118	1.5011e-35	-2.28437	6.72898e-41	-2.36278	7.50553e-36
128	K04G2.1	iftb-1	-2.07028	3.65935e-09	-2.67911	2.9865e-57	-2.37469	1.82967e-09
127	Y41D4A_3073.a	npp-8	-1.12044	6.03563e-13	-3.6461	1.42934e-54	-2.38327	3.01781e-13
126	Y71F9A_294.c	rpl-1	-2.40321	4.86271e-53			-2.40321	4.86271e-53
125	F08B1.1	vhp-1	-2.09186	1.33604e-31	-2.71471	1.31864e-18	-2.40329	6.59318e-19
124	C53D5.a	imb-3			-2.41639	1.92589e-47	-2.41639	1.92589e-47
123	F25H2.9	pas-5			-2.42857	1.74449e-57	-2.42857	1.74449e-57
122	Y55F3A_750.d	cct-8	-1.56418	4.71147e-16	-3.40035	2.91896e-54	-2.48226	2.35574e-16
121	Y87G2A.l	glp-4			-2.49552	4.20882e-51	-2.49552	4.20882e-51
120	R12E2.3	rpn-8			-2.56318	1.03225e-36	-2.56318	1.03225e-36
119	R10E11.2	vha-2	-2.61226	3.35515e-32			-2.61226	3.35515e-32
118	K07C5.4	K07C5.4	-2.5424	7.57673e-52	-2.78388	2.11613e-32	-2.66314	1.05807e-32
117	C36B1.3	rpb-3	-1.56012	3.77086e-07	-3.7853	3.71508e-76	-2.67271	1.88543e-07
116	F55A11.2	syx-5	-2.03931	4.66633e-33	-3.33755	1.87406e-44	-2.68843	2.33317e-33
115	K01C8.10	cct-4	-2.8724	9.79465e-39	-2.60247	2.53026e-48	-2.73744	4.89732e-39
114	F39H11.5	pbs-7	-3.60178	2.24414e-13	-2.07264	4.53792e-17	-2.83721	1.1223e-13
113	C32E8.2	rpl-13	-3.88797	1.98382e-60	-1.81661	4.72695e-48	-2.85229	2.36347e-48
112	Y105E8C.n	apg-1	-3.45939	7.46445e-27	-2.28288	5.61815e-43	-2.87113	3.73222e-27
111	T05C12.7	cct-1	-3.25118	3.52991e-38	-2.49637	7.68679e-54	-2.87377	1.76496e-38
110	F56A3.3	npp-6			-2.93074	2.93606e-57	-2.93074	2.93606e-57
109	C02F5.9	pbs-6	-1.72569	2.37136e-16	-4.16153	3.79789e-41	-2.94361	1.18568e-16
108	DY3.7	sup-17			-2.98985	1.02581e-72	-2.98985	1.02581e-72
107	Y105E8C.e	rps-20			-2.9908	1.10682e-15	-2.9908	1.10682e-15
106	W08E3.1	snr-2			-3.03546	3.83887e-13	-3.03546	3.83887e-13
105	K08D12.h	pbs-1	-3.07619	4.32743e-29			-3.07619	4.32743e-29
104	Y110A2A_54.i	ptc-3	-4.42606	3.53601e-22	-1.7615	3.72992e-34	-3.09378	1.76801e-22
103	T05F1.10	dhs-4			-3.11215	2.78888e-49	-3.11215	2.78888e-49
102	R13A5.12	lpd-7	-3.64619	1.68243e-82	-2.66012	9.35051e-52	-3.15316	4.67526e-52
101	ZK675.1	ptc-1	-4.99508	8.15869e-42	-1.31191	2.36905e-15	-3.15349	1.18452e-15
100	C47E12.1	sars-1	-2.94744	6.73995e-59	-3.43999	9.43375e-41	-3.19371	4.71688e-41
99	EEED8.5	mog-5	-2.18952	1.16121e-57	-4.21434	1.80967e-60	-3.20193	5.81508e-58
98	ZC434.2	rps-7	-3.45022	1.75949e-22	-3.02525	8.75273e-49	-3.23773	8.79747e-23
97	F53A3.3	rps-22	-3.85591	1.03873e-29	-2.64754	2.63032e-52	-3.25172	5.19364e-30
96	C45B2.7	ptr-4			-3.26761	1.66863e-19	-3.26761	1.66863e-19
95	F28H1.3	aars-2			-3.27116	1.18424e-60	-3.27116	1.18424e-60
94	B0464.1	dars-1			-3.29607	1.16809e-54	-3.29607	1.16809e-54
93	T20H4.3	pars-1	-3.34983	8.95064e-51	-3.27059	6.67075e-28	-3.31021	3.33538e-28
92	T01C3.7	fib-1	-3.50043	3.37929e-49	-3.19614	2.81573e-54	-3.34828	1.68966e-49
91	C42D8.5	acn-1			-3.36866	8.34239e-52	-3.36866	8.34239e-52
90	T21B10.7	cct-2	-3.19894	8.44981e-45	-3.5484	2.07549e-52	-3.37367	4.2249e-45
89	K07D8.1	mup-4	-3.25151	4.66874e-65	-3.49867	1.3182e-54	-3.37509	6.59099e-55
88	D1054.15	plrg-1	-3.57564	2.55451e-39	-3.20605	2.31745e-44	-3.39085	1.27727e-39
87	C49H3.11	rps-2	-3.46529	5.38605e-67			-3.46529	5.38605e-67
86	M110.4	ifg-1	-4.86368	9.01216e-41	-2.11253	2.57967e-48	-3.4881	4.50608e-41
85	C47B2.3	tba-2			-3.54255	4.61058e-39	-3.54255	4.61058e-39
84	T20F5.2	pbs-4			-3.56421	1.18195e-61	-3.56421	1.18195e-61
83	C23G10.3	rps-3	-5.73825	5.80488e-63	-1.39938	3.3191e-34	-3.56881	1.65955e-34
82	Y41D4A_3073.b	npp-8	-3.07278	1.24403e-16	-4.07852	1.05934e-54	-3.57565	6.22015e-17
81	F56E10.4	rps-27	-2.0667	1.5377e-15	-5.08664	3.90793e-54	-3.57667	7.68852e-16
80	K02F2.3	teg-4	-5.16182	6.34411e-41	-2.02202	2.22505e-40	-3.59192	1.42973e-40
79	D1007.6	rps-10	-5.41797	1.6932e-61	-1.81578	3.22154e-35	-3.61688	1.61077e-35
78	C37C3.2	C37C3.2	-3.26604	3.74444e-58	-3.99377	3.82031e-45	-3.6299	1.91015e-45
77	Y116A8C.42	snr-1	-5.65986	4.21901e-50	-1.64356	5.24814e-23	-3.65171	2.62407e-23
76	Y41D4A_3613.a	rps-28	-1.97886	8.20371e-16	-5.34347	4.4557e-54	-3.66116	4.10186e-16
75	T10B5.5	cct-7	-3.52272	3.75467e-58	-3.80051	9.07683e-65	-3.66161	1.87734e-58
74	B0412.4	rps-29			-3.6857	2.26524e-55	-3.6857	2.26524e-55
73	F42C5.8	rps-8	-3.23705	2.35065e-16	-4.21443	6.83636e-15	-3.72574	3.53571e-15
72	Y49A3A.2	vha-13	-3.60368	1.08801e-48	-3.85105	3.02026e-55	-3.72736	5.44005e-49
71	H06I04.a	ubl-1	-4.55195	1.56415e-30	-2.91465	1.91971e-25	-3.7333	9.59861e-26
70	T07A9.9	nog-1	-2.67277	1.06887e-30	-4.87058	3.23092e-51	-3.77167	5.34437e-31
69	Y106G6H.3	rpl-30	-4.43569	1.56646e-23	-3.2541	5.38168e-50	-3.84489	7.83228e-24
68	F37C12.4	rpl-36	-1.62093	1.35823e-34	-6.07591	2.02203e-29	-3.84842	1.01102e-29
67	F37C12.11	rps-21			-3.87497	2.04186e-28	-3.87497	2.04186e-28
66	Y110A2A_54.d	ptc-3			-3.96201	4.41856e-66	-3.96201	4.41856e-66
65	Y110A2A_54.e	ptc-3			-3.96208	8.02531e-66	-3.96208	8.02531e-66
64	H19N07.1	erfa-3	-3.97354	1.86678e-38	-3.96369	5.06066e-44	-3.96861	9.33392e-39
63	C56C10.3	vps-32.1	-4.04661	5.10602e-40			-4.04661	5.10602e-40
62	F26H9.6	rab-5	-4.26312	7.67055e-31	-3.89933	4.54458e-60	-4.08122	3.83527e-31
61	T14F9.1	vha-15	-4.61049	3.8926e-57	-3.60457	3.92878e-24	-4.10753	1.96439e-24
60	ZK328.2	eftu-2	-2.3815	1.01065e-59	-5.8708	3.55708e-60	-4.12615	6.83178e-60
59	K02A11.1	gfi-2	-3.36098	8.85643e-23	-4.99998	4.5223e-52	-4.18048	4.42822e-23
58	Y53G8B_1025.b	ubl-1	-2.6441	1.11759e-60	-5.80629	5.21067e-45	-4.2252	2.60533e-45
57	T04C12.5	act-2	-4.5062	4.31196e-39	-3.95888	1.45845e-44	-4.23254	2.15599e-39
56	W01F3.3	mlt-11	-4.23547	1.64249e-34			-4.23547	1.64249e-34
55	T04C12.4	act-3	-4.29781	9.71432e-40			-4.29781	9.71432e-40
54	C09H10.2	rpl-36.A	-6.52591	1.76057e-42	-2.11143	8.65462e-17	-4.31867	4.32731e-17
53	R10E11.8	vha-1	-3.72773	9.55851e-35	-4.98761	4.16514e-58	-4.35767	4.77925e-35
52	ZK1151.1	vab-10	-4.24109	1.48404e-29	-4.49533	4.62093e-76	-4.36821	7.42018e-30
51	Y41D4A_3457.d	npp-8			-4.41649	1.39901e-53	-4.41649	1.39901e-53
50	T01H3.1	vha-4	-5.11334	1.5718e-41	-3.84871	9.32758e-65	-4.48102	7.85901e-42
49	F20B6.2	vha-12	-5.90573	4.82652e-58	-3.10057	1.24661e-39	-4.50315	6.23304e-40
48	C50F2.3	C50F2.3			-4.51169	5.05268e-61	-4.51169	5.05268e-61
47	D1081.8	cdc-5L	-3.85952	1.64285e-13	-5.16709	7.53509e-76	-4.5133	8.21423e-14
46	Y46G5.d	snrp-200			-4.56445	2.33421e-66	-4.56445	2.33421e-66
45	Y24D9A.d	rpl-7A			-4.58203	7.33115e-39	-4.58203	7.33115e-39
44	ZK652.1	snr-5			-4.65138	2.51993e-55	-4.65138	2.51993e-55
43	F40F11.1	rps-11	-4.66383	4.30653e-66			-4.66383	4.30653e-66
42	T02G5.9	kars-1	-5.22515	4.24944e-41	-4.16221	2.9177e-51	-4.69368	2.12472e-41
41	F22B5.9	fars-3	-4.67875	8.17173e-45	-4.8075	9.17915e-53	-4.74313	4.08587e-45
40	B0393.1	rps-0	-5.9645	4.34201e-45	-3.56943	3.45813e-44	-4.76697	1.94617e-44
39	T27F2.1	skp-1	-4.77019	3.76695e-39			-4.77019	3.76695e-39
38	T13H5.4	T13H5.4	-4.978	2.64658e-45	-4.60572	2.83104e-53	-4.79186	1.32329e-45
37	R151.3	rpl-6	-4.81132	2.47482e-51			-4.81132	2.47482e-51
36	Y54E2A.11	eif-3.B			-4.84496	5.93578e-67	-4.84496	5.93578e-67
35	R10E11.1	cbp-1	-4.50619	4.1396e-36	-5.30677	5.68467e-59	-4.90648	2.0698e-36
34	R03G5.1	eef-1A.2			-4.94599	2.56506e-56	-4.94599	2.56506e-56
33	R11A8.6	iars-1	-6.11201	1.35079e-61	-3.81633	6.90152e-49	-4.96417	3.45076e-49
32	F37C12.9	rps-14	-4.48307	2.5168e-51	-5.55168	2.71021e-29	-5.01737	1.35511e-29
31	F40F8.10	rps-9			-5.03392	1.92374e-51	-5.03392	1.92374e-51
30	C16A3.9	rps-13	-2.93446	8.63604e-61	-7.14989	2.46184e-60	-5.04218	1.66272e-60
29	E04A4.8	rpl-20	-4.77143	8.04999e-53	-5.78103	3.99095e-39	-5.27623	1.99548e-39
28	M03F8.3	M03F8.3	-5.28567	3.6723e-50			-5.28567	3.6723e-50
27	T02G5.4	T02G5.4			-5.36796	1.2442e-51	-5.36796	1.2442e-51
26	ZK652.4	rpl-35	-5.63849	3.28185e-83	-5.34313	4.32605e-55	-5.49081	2.16302e-55
25	F36A2.6	rps-15	-6.86677	1.21199e-31	-4.22156	1.12719e-60	-5.54417	6.05993e-32
24	Y48G8A_3945.c	rpl-17	-5.60509	4.90238e-58			-5.60509	4.90238e-58
23	T05F1.3	rps-19	-7.54936	1.00156e-31	-3.66086	2.54289e-59	-5.60511	5.0078e-32
22	F10E7.7	rpl-33			-5.61249	1.32135e-51	-5.61249	1.32135e-51
21	F10B5.1	rpl-10			-5.72299	3.22474e-66	-5.72299	3.22474e-66
20	T04C12.6	act-1	-5.78964	1.80467e-40			-5.78964	1.80467e-40
19	C27D11.1	egl-45			-5.88116	1.89751e-55	-5.88116	1.89751e-55
18	C27A2.2	rpl-22	-5.91633	3.5115e-68			-5.91633	3.5115e-68
17	F07D10.1	rpl-11.2			-5.94981	4.52944e-25	-5.94981	4.52944e-25
16	C12C8.2	cbl-1	-6.70696	1.28177e-31	-5.40694	1.66022e-60	-6.05695	6.40884e-32
15	F25H5.3	pyk-1			-6.0742	7.20792e-61	-6.0742	7.20792e-61
14	F25H5.4	eef-2			-6.12657	4.55315e-61	-6.12657	4.55315e-61
13	F56F3.5	ins-17			-6.41897	2.44996e-45	-6.41897	2.44996e-45
12	F14B4.2	hxk-1	-6.43422	7.9013e-32	-6.43425	5.68943e-61	-6.43423	3.95065e-32
11	C04F12.3	ikb-1	-6.32258	1.16295e-23	-6.58948	2.42776e-52	-6.45603	5.81474e-24
10	C26D10.2	hel-1	-6.70777	1.34206e-45			-6.70777	1.34206e-45
9	F22B5.2	eif-3.G	-6.98561	4.40823e-45	-6.56994	1.87601e-53	-6.77777	2.20412e-45
8	K01G5.4	ran-1	-6.79043	1.73332e-70			-6.79043	1.73332e-70
7	R13A5.8	rpl-9			-6.87549	1.54998e-55	-6.87549	1.54998e-55
6	F28D1.7	rps-23	-6.92109	8.6423e-58			-6.92109	8.6423e-58
5	Y45F10D.12	rpl-18	-7.01254	1.14909e-70			-7.01254	1.14909e-70
4	C26F1.9	rpl-39	-7.4813	1.00084e-60	-6.86111	1.80439e-47	-7.1712	9.02193e-48
3	T07A9.11	rps-24	-8.41494	5.71904e-35			-8.41494	5.71904e-35
2	Y57G11C.16	rps-18	-8.7961	1.82969e-70			-8.7961	1.82969e-70
1	T05E11.1	rps-5	-8.96328	8.47409e-66			-8.96328	8.47409e-66

## Sheet: daf-2;phb-1RNAi - Reduced UPRmt
Columna1	GeneID	Name	LFC 1st rep	P_val 1st rep	LFC 2nd rep	P_val 2nd rep	mean LFC	mean P_val
377	ZK563.6	acp-1	-1.0835	2.41436e-07	-0.260951	0.0632533	-0.672226	0.0316268
297	D2092.3	acr-11			-0.843232	0.000192487	-0.843232	0.000192487
69	T04C12.5	act-2	-4.68253	3.53362e-87	-0.774285	1.09536e-06	-2.72841	5.47679e-07
157	Y6B3A.1	agef-1	-2.09285	6.81563e-21	-1.18062	8.69055e-09	-1.63673	4.34527e-09
286	F48F7.1	alg-1			-0.874146	6.54249e-13	-0.874146	6.54249e-13
327	T20B5.1	apa-2	-0.841249	2.27871e-11	-0.675865	1.2528e-05	-0.758557	6.264e-06
52	Y105E8C.n	apg-1			-2.96946	3.01224e-22	-2.96946	3.01224e-22
122	F29G9.3	aps-1	-2.02413	4.51712e-23			-2.02413	4.51712e-23
303	F02E8.3	aps-2	-1.36134	3.95496e-07	-0.273162	0.00433421	-0.81725	0.0021673
374	Y48G8A_3945.e	aps-3			-0.674361	2.03928e-11	-0.674361	2.03928e-11
43	F57H12.1	arf-3	-3.16576	1.29691e-28			-3.16576	1.29691e-28
249	F54C9.10	arl-1			-1.0066	2.8336e-10	-1.0066	2.8336e-10
409	Y53F4C.b	arp-1	-1.44639	2.39059e-10	0.221279	0.0182383	-0.612558	0.00911915
250	Y79H2A.6	arx-3	-0.720732	1.88117e-07	-1.28272	1.18524e-10	-1.00173	9.41179e-08
299	Y37D8A.1	arx-5	-0.603487	2.77547e-07	-1.0734	4.94639e-08	-0.838442	1.63505e-07
420	W03G1.7	asm-3	-0.550852	0.00206003	-0.634871	2.48281e-05	-0.592862	0.00104243
346	C45G3.1	aspm-1			-0.720186	0.00735921	-0.720186	0.00735921
364	H20J04.f	athp-2			-0.693748	1.77519e-06	-0.693748	1.77519e-06
189	B0261.1	B0261.1	-1.44523	7.35377e-07	-1.17657	2.31829e-13	-1.3109	3.67689e-07
362	B0334.3	B0334.3	-1.7137	7.08088e-17	0.323508	0.0367013	-0.695095	0.0183506
266	B0336.3	B0336.3	-0.339906	0.000995654	-1.50339	2.92579e-29	-0.921646	0.000497827
44	B0511.6	B0511.6	-3.68549	5.40565e-28	-2.62257	3.18611e-36	-3.15403	2.70282e-28
137	T23F2.1	bus-8	-1.94473	3.24523e-17	-1.74409	2.27214e-34	-1.84441	1.62261e-17
240	F57B9.5	byn-1	-0.59338	1.91056e-17	-1.4927	2.94045e-26	-1.04304	9.55279e-18
117	C01F1.3	C01F1.3	-2.11952	1.13165e-11			-2.11952	1.13165e-11
169	C10H11.8	C10H11.8	-2.63944	2.94329e-19	-0.359279	9.9567e-05	-1.49936	4.97835e-05
398	C14C10.5	C14C10.5	-0.856549	4.26271e-14	-0.385202	0.00532181	-0.620876	0.00266091
199	C16A3.4	C16A3.4	-0.310571	0.000272979	-2.18451	3.21695e-35	-1.24754	0.00013649
401	C26D10.4	C26D10.4	-1.5861	1.91015e-06	0.345863	0.000420949	-0.620118	0.00021143
415	C28F5.4	C28F5.4	-1.48848	1.02845e-08	0.288463	0.0271315	-0.600007	0.0135658
82	C30B5.6	C30B5.6	-3.19095	1.21041e-38	-1.81888	2.14103e-29	-2.50492	1.07052e-29
166	C30F12.1	C30F12.1			-1.5409	1.55944e-17	-1.5409	1.55944e-17
317	C37A2.7	C37A2.7	-0.743045	3.99896e-05	-0.833782	4.60179e-08	-0.788413	2.00178e-05
217	C37H5.5	C37H5.5	-1.60589	5.00187e-23	-0.727754	3.38035e-05	-1.16682	1.69017e-05
375	C46H3.3	C46H3.3	-1.60895	2.92057e-13	0.260675	0.0319723	-0.674139	0.0159862
172	C47E12.7	C47E12.7	-1.30101	1.90234e-11	-1.62532	1.95436e-11	-1.46316	1.92835e-11
31	C53H9.2	C53H9.2	-3.0296	9.51387e-10	-3.9849	5.69939e-44	-3.50725	4.75693e-10
243	W03H9.4	cacn-1	-1.68913	1.12623e-10	-0.3696	2.63595e-05	-1.02936	1.31798e-05
115	M03F4.7	calu-1	-2.99718	8.81427e-13	-1.25974	1.12179e-12	-2.12846	1.00161e-12
231	T05C1.4	camt-1	-2.63737	2.59517e-13	0.430772	0.00652166	-1.1033	0.00326083
149	F55C5.4	capg-2	-1.4136	1.99977e-23	-1.94305	1.67809e-18	-1.67833	8.39056e-19
263	C18E3.6	cas-2	-3.0763	1.41881e-25	1.20614	5.73046e-08	-0.935082	2.86523e-08
24	R10E11.1	cbp-1	-0.658974	0.0189075	-7.2134	1.7327e-49	-3.93619	0.00945374
127	T05C12.7	cct-1			-1.97713	8.79751e-38	-1.97713	8.79751e-38
61	T21B10.7	cct-2	-3.20723	1.43903e-20	-2.40833	7.25896e-38	-2.80778	7.19516e-21
50	K01C8.10	cct-4	-3.293	8.19188e-21	-2.66018	1.73056e-39	-2.97659	4.09594e-21
301	C07G2.3	cct-5	-0.92967	1.41551e-09	-0.724919	1.5381e-05	-0.827295	7.69119e-06
33	T10B5.5	cct-7	-2.93918	6.08455e-49	-3.84992	1.23099e-50	-3.39455	3.10383e-49
56	Y55F3A_750.d	cct-8	-2.57035	1.40947e-54	-3.22417	4.00629e-61	-2.89726	7.04735e-55
83	W08F4.8	cdc-37			-2.45948	1.45537e-27	-2.45948	1.45537e-27
167	R07G3.1	cdc-42	-2.83424	1.0758e-13	-0.213469	0.0537094	-1.52386	0.0268547
290	C06A1.1	cdc-48.1			-0.861083	1.29863e-08	-0.861083	1.29863e-08
370	C34G6.5	cdc-7	-1.66312	0.000155783	0.310508	0.0189518	-0.676308	0.00955381
392	K03E5.3	cdk-2	-0.411475	0.0160983	-0.866207	7.51124e-07	-0.638841	0.00804952
106	Y54E10A_156.a	cdt-1			-2.22412	1.45662e-48	-2.22412	1.45662e-48
113	F56D2.7	ced-6			-2.15535	1.18997e-37	-2.15535	1.18997e-37
118	K02B12.1	ceh-6			-2.10837	7.64297e-14	-2.10837	7.64297e-14
147	C03D6.3	cel-1	-2.1106	9.35786e-38	-1.26987	1.8636e-34	-1.69023	9.32265e-35
356	D1046.1	cfim-2	-0.430847	0.000949421	-0.980778	1.77629e-06	-0.705812	0.000475599
235	Y110A7A.g	chp-1	-1.57487	1.79476e-05	-0.572277	4.2639e-05	-1.07358	3.02933e-05
242	F55F8.4	cir-1	-1.69272	1.99224e-05	-0.386863	0.000154028	-1.03979	8.6975e-05
306	B0285.9	ckb-2	-1.30802	3.81948e-17	-0.314496	0.000330193	-0.81126	0.000165096
343	K02F3.5	clec-149	-1.71647	1.48178e-14	0.250699	0.00813298	-0.732886	0.00406649
272	Y38E10A.d	clec-8	-1.42958	1.12209e-10	-0.380674	5.51914e-06	-0.905126	2.75962e-06
422	C34F6.2	col-178	-1.48792	5.39442e-05	0.3033	0.0393009	-0.592309	0.0196774
426	F45G2.4	cope-1			-0.58121	0.00879982	-0.58121	0.00879982
332	F59A3.1	cpd-1	-1.15412	2.50058e-06	-0.349613	0.00246693	-0.751864	0.00123471
280	F56A8.6	cpf-2			-0.886628	6.09519e-13	-0.886628	6.09519e-13
269	F43G9.9	cpn-1			-0.909694	2.12359e-06	-0.909694	2.12359e-06
58	F09G2.4	cpsf-2	-2.94829	3.98563e-47	-2.81534	1.61824e-47	-2.88181	2.80194e-47
223	F11A10.3	cpsf-4	-0.672441	1.23328e-07	-1.61552	6.95547e-21	-1.14398	6.16641e-08
368	C14A4.5	crn-5	-1.52659	2.10999e-15	0.167816	0.0745854	-0.679385	0.0372927
102	W06H3.3	ctps-1	-2.28177	1.67748e-60	-2.21387	5.70498e-47	-2.24782	2.85249e-47
254	D2045.6	cul-1	-0.582113	8.55656e-12	-1.37807	1.35291e-36	-0.980089	4.27828e-12
98	T06E6.2	cyb-3	-2.28888	2.03417e-39	-2.27488	5.0368e-38	-2.28188	2.62011e-38
413	Y38F1A.5	cyd-1			-0.601997	1.91093e-07	-0.601997	1.91093e-07
260	C37A2.4	cye-1	-0.787507	7.21634e-05	-1.11502	1.65293e-18	-0.951263	3.60817e-05
55	C52E4.6	cyl-1	-2.91089	3.2983e-62			-2.91089	3.2983e-62
322	T10B9.2	cyp-13A5	-0.922852	3.17951e-06	-0.63319	1.82041e-05	-0.778021	1.06918e-05
323	Y80D3B.d	cyp-42A1	-0.34272	0.0355462	-1.20848	4.05201e-05	-0.775601	0.0177934
193	Y80D3B.c	cyp-42A1			-1.26094	2.78558e-15	-1.26094	2.78558e-15
123	D2085.3	D2085.3			-2.02211	1.61136e-33	-2.02211	1.61136e-33
341	H38K22.2	dcn-1	-1.29866	2.5857e-06	-0.182642	0.0346626	-0.740649	0.0173326
41	T05F1.10	dhs-4	-3.20077	1.72645e-27			-3.20077	1.72645e-27
338	F08B4.1	dic-1	-0.743211	7.96907e-08			-0.743211	7.96907e-08
42	F23C8.6	did-2			-3.18528	2.14773e-37	-3.18528	2.14773e-37
273	C04G2.6	dis-3	-0.84759	3.11969e-11	-0.960391	8.26517e-06	-0.903991	4.1326e-06
155	ZK593.5	dnc-1	-0.985186	1.35539e-12	-2.30386	1.49706e-31	-1.64452	6.77693e-13
220	T14B4.6	dpy-2	-1.5781	8.34012e-12	-0.72312	9.69377e-10	-1.15061	4.88858e-10
209	R160.1	dpy-23	-1.70289	6.91802e-09	-0.696162	1.04366e-06	-1.19952	5.25287e-07
139	EGAP7.1	dpy-3			-1.76819	1.68318e-24	-1.76819	1.68318e-24
173	F46C8.6	dpy-7			-1.46127	3.78833e-25	-1.46127	3.78833e-25
268	C17H12.1	dyci-1	-1.27711	0.000257326	-0.557836	0.00279726	-0.917475	0.00152729
4	C02C6.1	dyn-1	-5.50258	8.84352e-90			-5.50258	8.84352e-90
145	E02H1.1	E02H1.1	-2.19621	1.20016e-19	-1.21764	2.84713e-27	-1.70693	6.00082e-20
386	E02H1.2	E02H1.2	-0.966517	0.000248684	-0.357821	0.00107827	-0.662169	0.000663479
6	R03G5.1	eef-1A.2			-5.10447	4.05068e-35	-5.10447	4.05068e-35
256	F17C11.9	eef-1G	-0.417672	0.00294495	-1.51926	1.06289e-18	-0.968466	0.00147247
9	ZK328.2	eftu-2	-4.92106	1.93159e-64			-4.92106	1.93159e-64
224	F58A3.2	egl-15	-1.73552	1.60409e-11	-0.545957	0.000437066	-1.14074	0.000218533
344	F22E12.4	egl-9	-0.459999	7.98625e-09	-0.997164	2.10353e-11	-0.728582	4.00364e-09
382	T27F7.3	eif-1			-0.663254	1.24961e-08	-0.663254	1.24961e-08
62	B0511.10	eif-3.E	-3.49913	1.36999e-28	-2.10245	6.20545e-30	-2.80079	7.16021e-29
138	C47B2.5	eif-6			-1.8199	3.66194e-13	-1.8199	3.66194e-13
214	F10B5.6	emb-27	-1.70084	1.33497e-10	-0.659309	1.45573e-09	-1.18007	7.94616e-10
5	H19N07.1	erfa-3	-4.56269	3.30572e-88	-6.32304	9.34194e-55	-5.44287	4.67097e-55
186	F31D4.1	exos-7	-1.7014	6.40529e-12	-1.01621	3.15822e-12	-1.35881	4.78176e-12
311	F07A11.5	F07A11.5	-1.83437	1.07609e-21	0.233148	0.0359654	-0.800613	0.0179827
324	F10C2.4	F10C2.4	-0.326968	0.0495046	-1.21432	3.94241e-12	-0.770646	0.0247523
348	F11A3.2	F11A3.2			-0.716194	5.5382e-05	-0.716194	5.5382e-05
135	F18C12.3	F18C12.3	-2.01929	9.33819e-36	-1.71116	1.82106e-24	-1.86523	9.1053e-25
74	F20D12.2	F20D12.2	-2.67601	5.14633e-15			-2.67601	5.14633e-15
298	F23B12.7	F23B12.7	-0.660617	4.03412e-11	-1.02504	1.24994e-07	-0.84283	6.25171e-08
378	F27D4.4	F27D4.4			-0.669294	0.0041917	-0.669294	0.0041917
245	F30H5.3	F30H5.3	-2.35041	2.98412e-31	0.301926	0.0468231	-1.02424	0.0234115
357	F37B12.3	F37B12.3	-0.878226	1.57729e-07	-0.530502	8.61795e-05	-0.704364	4.31686e-05
188	F37C12.1	F37C12.1	-0.646403	7.11446e-12	-2.00801	1.16151e-33	-1.32721	3.55723e-12
190	F39H12.3	F39H12.3	-2.92159	9.17943e-29	0.350237	0.0443382	-1.28568	0.0221691
160	F43G9.12	F43G9.12	-2.27629	4.59569e-46	-0.984154	1.02859e-09	-1.63022	5.14296e-10
112	F44G4.1	F44G4.1	-2.72995	5.02342e-19	-1.61835	1.98592e-26	-2.17415	2.51171e-19
335	F47B7.2	F47B7.2	-0.979115	5.88149e-05	-0.513933	0.000299932	-0.746524	0.000179373
353	F47F2.1	F47F2.1	-1.20069	8.81873e-12	-0.218951	0.0735997	-0.709821	0.0367999
394	F49C12.12	F49C12.12	-0.629847	0.000266682			-0.629847	0.000266682
326	F49C5.4	F49C5.4	-1.25128	1.61021e-05	-0.269883	0.0041128	-0.760581	0.00206445
95	F53B7.3	F53B7.3			-2.29435	1.62764e-47	-2.29435	1.62764e-47
109	F53F4.11	F53F4.11	-2.0087	4.70714e-37	-2.39847	5.74895e-42	-2.20358	2.3536e-37
347	F55F8.9	F55F8.9	-1.68799	2.98621e-05	0.253884	0.0104153	-0.717052	0.00522256
73	F57B9.3	F57B9.3	-2.69668	3.20047e-69			-2.69668	3.20047e-69
419	Y71H10A.2	fard-1	-1.48678	2.27821e-08	0.300404	0.00879548	-0.593186	0.00439775
22	T08B2.9	fars-1	-4.30874	3.8471e-18	-3.70482	2.68761e-54	-4.00678	1.92355e-18
16	F22B5.9	fars-3			-4.19797	3.72168e-43	-4.19797	3.72168e-43
66	T01C3.7	fib-1	-2.75589	2.10969e-42			-2.75589	2.10969e-42
258	F31D4.3	fkb-6	-1.2979	2.74455e-11	-0.620267	3.47044e-06	-0.959085	1.73523e-06
89	F52D10.3	ftt-2	-2.35746	8.12659e-24			-2.35746	8.12659e-24
345	Y59A8A.b	gck-3	-0.651991	2.26404e-12	-0.80019	1.25113e-10	-0.726091	6.36885e-11
366	C35C5.2	gcp-2.2	-1.69444	6.70697e-13	0.329453	0.00156555	-0.682492	0.000782775
51	K02A11.1	gfi-2	-2.971	1.03592e-41			-2.971	1.03592e-41
340	T21G5.3	glh-1			-0.741469	0.000386924	-0.741469	0.000386924
49	Y87G2A.l	glp-4			-2.99845	1.97295e-74	-2.99845	1.97295e-74
226	ZK121.b	glrx-21	-0.523099	0.000296008	-1.72571	6.07506e-34	-1.12441	0.000148004
329	Y53F4C.l	gst-28	-1.84463	6.29935e-13	0.329409	0.0231753	-0.757609	0.0115876
331	T03F1.8	guk-1	-2.97694	2.64994e-20	1.47015	2.80292e-13	-0.753395	1.40146e-13
131	T11G6.1	hars-1	-1.54925	7.98778e-29	-2.36579	3.5694e-27	-1.95752	1.82464e-27
284	F13D11.2	hbl-1	-0.897614	2.07066e-14	-0.85557	3.78875e-14	-0.876592	2.92971e-14
312	F43G6.4	hda-5	-1.93704	7.43138e-19	0.350635	0.00418151	-0.793204	0.00209076
94	C07G1.5	hgrs-1	-2.2952	6.23739e-44			-2.2952	6.23739e-44
270	F38A6.3	hif-1	-1.47694	1.9015e-11	-0.33614	0.0146968	-0.906539	0.00734842
314	ZK131.4	his-14	-0.651548	0.0030671	-0.931832	1.51821e-16	-0.79169	0.00153355
287	F17E9.10	his-32	-0.867118	2.85267e-06			-0.867118	2.85267e-06
388	DY3.3	hlh-16	-1.02719	3.88789e-18	-0.28384	0.0320276	-0.655515	0.0160138
393	F54A5.1	hmbx-1			-0.637789	0.000154825	-0.637789	0.000154825
225	T20B12.8	hmg-4	-1.1899	5.43172e-33	-1.06994	5.64626e-11	-1.12992	2.82313e-11
352	F08F8.2	hmgr-1	-0.170276	0.0534987	-1.2522	3.55892e-17	-0.711236	0.0267494
86	F25B4.6	hmgs-1	-1.50812	1.58139e-29	-3.28516	4.89999e-52	-2.39664	7.90696e-30
292	Y110A2A_1898.d	hpo-20	-1.97318	4.33929e-28	0.264367	0.0298804	-0.854404	0.0149402
376	Y37D8A.10	hpo-21	-0.6601	6.26723e-07	-0.684668	0.000195552	-0.672384	9.80893e-05
295	F42A6.7	hrp-1	-0.749386	2.39752e-11	-0.940676	3.65858e-08	-0.845031	1.83049e-08
277	Y53C10A.12	hsf-1	-1.14815	1.194e-15	-0.647099	2.36617e-05	-0.897625	1.18308e-05
381	C15H9.6	hsp-3	-0.598747	8.97485e-05	-0.729492	2.4607e-06	-0.664119	4.61046e-05
281	C34F6.4	hst-2	-2.12926	1.17517e-13	0.364855	0.00230371	-0.882202	0.00115185
148	F40H3.5	hst-3.1	-2.42144	5.88337e-35	-0.949418	2.78685e-13	-1.68543	1.39343e-13
2	R11A8.6	iars-1	-5.57439	9.99645e-58			-5.57439	9.99645e-58
369	Y65B4B_10.d	icd-2			-0.678887	2.13483e-12	-0.678887	2.13483e-12
234	Y65B4B_10.b	icd-2			-1.07697	2.65819e-27	-1.07697	2.65819e-27
185	C01F6.8	icln-1	-1.37787	7.91985e-15			-1.37787	7.91985e-15
360	C34F6.8	idh-2	-1.77847	3.95093e-14	0.378831	0.00297718	-0.699821	0.00148859
68	F54C9.1	iff-2	-3.45524	3.2679e-21	-2.01787	4.02114e-35	-2.73655	1.63395e-21
107	M110.4	ifg-1			-2.21867	1.50472e-46	-2.21867	1.50472e-46
54	K04G2.1	iftb-1			-2.92406	7.08449e-29	-2.92406	7.08449e-29
116	F32E10.4	ima-3	-2.12177	1.17517e-13			-2.12177	1.17517e-13
120	F57B9.6	inf-1			-2.04479	3.00412e-26	-2.04479	3.00412e-26
310	C06A5.1	inst-1	-1.19735	2.58619e-05	-0.406788	0.000263884	-0.80207	0.000144873
67	K07A1.9	K07A1.9	-6.78884	5.6972e-23	1.31332	1.48746e-12	-2.73776	7.43731e-13
75	K07C5.4	K07C5.4	-2.476	7.90876e-62	-2.85071	1.02045e-42	-2.66335	5.10225e-43
320	K10C3.4	K10C3.4			-0.7799	9.68622e-10	-0.7799	9.68622e-10
203	K12H4.3	K12H4.3	-0.457284	4.84721e-06	-1.97681	1.16368e-30	-1.21705	2.4236e-06
11	T02G5.9	kars-1	-5.48336	1.61184e-36	-3.50995	1.54453e-49	-4.49666	8.05921e-37
196	C29E4.2	kle-2	-1.183	6.873e-16	-1.31932	3.58509e-21	-1.25116	3.43652e-16
282	Y54G9A.3	kqt-3	-1.48175	7.55345e-11	-0.28017	0.000397788	-0.88096	0.000198894
365	ZK1067.1	let-23	-0.713897	0.000535501	-0.657223	1.3458e-08	-0.68556	0.000267757
194	C44H4.2	let-4	-1.4742	1.37794e-08	-1.04663	4.20313e-09	-1.26042	8.99128e-09
238	C01G8.8	let-526	-1.73496	5.13976e-10	-0.366111	0.00134876	-1.05053	0.000674381
23	M7.1	let-70	-3.96424	2.78115e-72			-3.96424	2.78115e-72
175	F57B9.2	let-711	-1.4386	9.62035e-49			-1.4386	9.62035e-49
416	H19M22.2	let-805			-0.599305	0.00515988	-0.599305	0.00515988
36	F38H4.9	let-92	-2.98201	6.58452e-34	-3.71649	1.90483e-45	-3.34925	3.29226e-34
192	C39B10.2	lgc-41	-2.79847	1.89221e-23	0.245834	0.0154441	-1.27632	0.00772207
78	Y71D11A.b	lgc-46			-2.59328	4.21978e-46	-2.59328	4.21978e-46
358	C29A12.3	lig-1	-0.737583	1.10272e-08	-0.66664	0.0177702	-0.702112	0.00888508
174	C32F10.2	lin-35	-1.88155	3.75635e-10	-1.0092	3.17315e-14	-1.44537	1.87834e-10
279	K07A1.12	lin-53	-0.673255	4.67158e-05	-1.1013	0.000138973	-0.887279	9.28446e-05
427	JC8.6	lin-54	-0.748824	3.36355e-16	-0.412255	0.000267378	-0.580539	0.000133689
248	W06F12.1	lit-1	-0.995482	3.48263e-06	-1.01994	0.000157386	-1.00771	8.04344e-05
354	C48E7.3	lpd-2	-0.955493	0.000972583	-0.46304	3.71579e-05	-0.709267	0.00050487
221	K09H9.6	lpd-6	-0.608468	0.00371779	-1.69031	1.00582e-17	-1.14939	0.0018589
25	R13A5.12	lpd-7	-4.69589	4.07349e-66	-2.95668	3.79171e-39	-3.82629	1.89586e-39
15	H37A05.1	lpin-1	-3.46549	2.3611e-41	-4.9416	4.64985e-46	-4.20355	1.18057e-41
342	M05D6.2	M05D6.2	-1.68924	2.02156e-10	0.213471	0.0537726	-0.737885	0.0268863
318	M28.5	M28.5			-0.787503	4.87154e-11	-0.787503	4.87154e-11
241	R09B3.5	mag-1	-1.00499	4.20313e-09	-1.08095	2.77207e-23	-1.04297	2.10156e-09
294	Y110A7A.d	mat-1			-0.853957	0.000132242	-0.853957	0.000132242
293	Y38F1A.10	max-2	-0.927571	9.59068e-05	-0.780566	3.4859e-08	-0.854069	4.79708e-05
313	Y17G7B.5	mcm-2	-1.29189	8.52713e-09	-0.291786	0.0444323	-0.791836	0.0222161
424	ZK632.1	mcm-6	-0.58666	0.0107942			-0.58666	0.0107942
108	F32D1.10	mcm-7	-2.42688	1.26633e-25	-2.01005	2.15851e-27	-2.21846	6.43959e-26
334	R12B2.5	mdt-15	-0.746959	3.12815e-10			-0.746959	3.12815e-10
210	Y113G7B.21	mdt-17			-1.19854	7.88041e-12	-1.19854	7.88041e-12
91	F40F11.2	mig-38	-1.91082	3.00263e-38	-2.79125	4.08923e-41	-2.35103	1.50336e-38
350	F35D2.4	mks-3	-1.70156	3.94359e-09	0.271349	0.0404081	-0.715107	0.0202041
12	W01F3.3	mlt-11			-4.40113	2.33007e-49	-4.40113	2.33007e-49
176	Y39C12A.a	mlt-3	-1.0852	2.43377e-12	-1.7848	6.33276e-49	-1.435	1.21688e-12
383	C04H5.6	mog-4	-0.649839	0.000374722	-0.675787	0.00642959	-0.662813	0.00340216
136	W10G6.3	mua-6	-1.75533	6.40853e-20	-1.94178	4.77574e-17	-1.84855	2.39108e-17
3	K07D8.1	mup-4	-6.35977	1.21874e-66	-4.66589	6.44546e-42	-5.51283	3.22273e-42
129	D2096.8	nap-1	-1.53506	4.49937e-27	-2.3941	2.42093e-22	-1.96458	1.21049e-22
143	F22D6.3	nars-1	-2.30827	3.0206e-26	-1.13883	1.47916e-12	-1.72355	7.39579e-13
57	F55A12.8	nath-10			-2.88532	5.82683e-47	-2.88532	5.82683e-47
85	F37E3.1	ncbp-1	-2.69022	9.98691e-27	-2.13527	7.57419e-32	-2.41274	4.99349e-27
387	F02E8.6	ncr-1			-0.661317	0.00171931	-0.661317	0.00171931
252	C43E11.7	ndx-7	-3.38847	7.836e-27	1.39343	9.99466e-07	-0.997522	4.99733e-07
64	ZC581.1	nekl-2			-2.78114	2.55088e-37	-2.78114	2.55088e-37
265	ZK20.6	nep-1	-1.55794	3.1809e-14	-0.287057	0.00519561	-0.922501	0.0025978
261	F11C1.6	nhr-25	-0.951039	1.83196e-17			-0.951039	1.83196e-17
309	Y26D4A.1	nhr-85	-0.802869	0.000410412			-0.802869	0.000410412
396	F57C7.2	nhx-5	-1.5475	2.03928e-11	0.304443	0.0172166	-0.621527	0.00860829
404	K09A9.1	nipi-3	0.689936	9.48557e-09	-1.92045	2.73363e-21	-0.615259	4.74279e-09
328	F07F6.6	nmr-1	-1.82273	4.92534e-16	0.307109	0.074123	-0.75781	0.0370615
21	T07A9.9	nog-1			-4.00781	1.7083e-51	-4.00781	1.7083e-51
285	W07E6.1	nol-1	-1.29236	1.36377e-06	-0.458496	0.0225901	-0.87543	0.0112957
29	W01B11.3	nol-5			-3.6194	1.88106e-44	-3.6194	1.88106e-44
201	K07F5.13	npp-1	-1.2299	7.39806e-07			-1.2299	7.39806e-07
361	F53F10.5	npp-11	-2.56096	7.86756e-20	1.17032	2.0513e-08	-0.695324	1.02565e-08
134	R07G3.3	npp-21	-2.26894	1.02422e-12	-1.47837	3.65052e-24	-1.87365	5.12112e-13
181	Y41D4A_3457.a	npp-8	-1.40431	7.15469e-22			-1.40431	7.15469e-22
46	Y41D4A_2768.a	npp-8	-3.05359	2.77753e-26			-3.05359	2.77753e-26
28	ZK1014.1	nsf-1			-3.63048	1.55549e-38	-3.63048	1.55549e-38
183	K01C8.9	nst-1			-1.39161	7.037e-23	-1.39161	7.037e-23
283	Y53F4B.f	nsun-5			-0.88045	4.62897e-10	-0.88045	4.62897e-10
142	Y71F9A_279.b	nxt-1			-1.72514	2.47772e-15	-1.72514	2.47772e-15
389	Y106G6H.2	pab-1	-0.761108	1.6308e-09	-0.543569	1.25427e-08	-0.652338	7.08673e-09
399	F18H3.3	pab-2	-0.442143	2.4229e-07	-0.799186	4.42098e-15	-0.620664	1.21145e-07
153	C17E4.5	pabp-2			-1.6547	4.16366e-07	-1.6547	4.16366e-07
63	M88.6	pan-1	-2.61001	3.73307e-31	-2.95832	6.54354e-48	-2.78416	1.86654e-31
230	H39E23.1	par-1	-0.866676	3.75458e-13	-1.34123	4.34089e-16	-1.10395	1.87946e-13
38	T20H4.3	pars-1	-3.29297	3.93063e-64			-3.29297	3.93063e-64
111	Y110A7A.j	pas-3	-2.38118	5.90108e-31	-2.0009	2.37727e-27	-2.19104	1.18893e-27
104	Y110A7A.f	pas-3	-2.56855	1.8184e-29	-1.88591	8.24919e-15	-2.22723	4.12459e-15
96	R144.2	pcf-11	-1.28799	2.38913e-07	-3.28355	2.44925e-44	-2.28577	1.19456e-07
205	C07A12.4	pdi-2	-1.92033	5.35356e-10	-0.501925	2.51691e-05	-1.21113	1.25848e-05
351	F42E11.1	pgp-4	-1.78373	2.96651e-08	0.355485	0.0127088	-0.714122	0.00635442
207	F38A6.1	pha-4	-1.23788	1.92897e-05	-1.16929	7.25227e-09	-1.20358	9.6485e-06
219	W05H5.3	pitr-6	-1.95993	8.68827e-15	-0.344594	0.000194716	-1.15226	9.73578e-05
165	C14B9.4	plk-1	-1.03849	4.62291e-13	-2.10441	2.24968e-34	-1.57145	2.31145e-13
19	D1054.15	plrg-1	-4.10564	3.72418e-84			-4.10564	3.72418e-84
333	F08B4.5	pole-2	-0.544286	2.87542e-08	-0.95898	9.47334e-06	-0.751633	4.75105e-06
339	E01A2.b	poml-3	-2.7196	6.92965e-19	1.23523	3.13313e-08	-0.742187	1.56657e-08
288	W03D8.4	pop-1	-0.439256	0.0188776	-1.29035	9.11945e-11	-0.864801	0.0094388
187	F58A4.4	pri-1	-0.536325	1.51858e-05	-2.1316	1.31059e-16	-1.33396	7.5929e-06
130	Y39B6B.a	pro-3			-1.96359	2.39893e-31	-1.96359	2.39893e-31
34	Y110A7A.m	prp-31	-3.38351	2.00631e-38			-3.38351	2.00631e-38
405	D1054.14	prp-38	-0.274411	0.00169	-0.953447	5.05158e-15	-0.613929	0.000844999
237	Y59A8C.b	prp-6	-0.721983	1.98997e-14	-1.38949	1.44352e-28	-1.05573	9.94983e-15
390	C34C6.6	prx-5	-0.974559	0.000372882	-0.319791	0.0171063	-0.647175	0.00873959
128	ZK675.1	ptc-1			-1.97032	3.66853e-25	-1.97032	3.66853e-25
26	Y110A2A_54.i	ptc-3			-3.66244	1.16554e-56	-3.66244	1.16554e-56
10	Y110A2A_54.e	ptc-3			-4.80669	5.97269e-60	-4.80669	5.97269e-60
8	Y110A2A_54.d	ptc-3			-4.96008	7.66731e-60	-4.96008	7.66731e-60
60	C45B2.7	ptr-4	-2.86638	1.74858e-38			-2.86638	1.74858e-38
255	C47E12.4	pyp-1	-0.715493	3.05613e-08	-1.23633	4.32847e-10	-0.975911	1.54971e-08
182	Y41E3.4	qars-1	-1.10311	7.38201e-16	-1.69012	4.58432e-31	-1.39662	3.69101e-16
257	T05C12.10	qua-1			-0.966789	2.52866e-06	-0.966789	2.52866e-06
423	R07G3.8	R07G3.8	-1.43944	0.000105558	0.265645	0.00183009	-0.5869	0.000967825
247	R08D7.2	R08D7.2	-0.321754	0.00082971	-1.6958	5.94179e-40	-1.00878	0.000414855
359	R09E10.5	R09E10.5	-0.70001	0.000494288			-0.70001	0.000494288
425	R166.2	R166.2	-1.36933	2.02928e-07	0.206712	0.0904305	-0.581309	0.0452154
397	T01B7.3	rab-21	-1.51144	2.22023e-06	0.269108	0.0524261	-0.621164	0.0262142
146	W03C9.3	rab-7	-2.84628	6.07242e-29	-0.561049	3.9099e-05	-1.70367	1.95495e-05
315	K04D7.1	rack-1	-0.790816	3.66042e-05			-0.790816	3.66042e-05
158	C26D10.1	ran-3	-1.684	2.80032e-11	-1.58546	2.04186e-28	-1.63473	1.40016e-11
159	F36F2.3	rbpl-1			-1.63072	3.47806e-07	-1.63072	3.47806e-07
262	ZK287.5	rbx-1	-0.608548	1.11923e-10	-1.27489	2.66793e-15	-0.941718	5.59627e-11
337	R05D3.4	rfp-1	-0.513044	1.12597e-12	-0.975238	3.1809e-14	-0.744141	5.7889e-13
325	C06E1.10	rha-2	-0.218345	0.00699739	-1.32243	7.04937e-24	-0.770386	0.0034987
291	Y62E10A.d	rla-2	-0.375198	2.70362e-07	-1.33684	1.60419e-21	-0.856018	1.35181e-07
244	F18C12.2	rme-8			-1.02704	1.10051e-10	-1.02704	1.10051e-10
163	R07E5.14	rnp-4	-1.90456	1.71556e-29	-1.27906	1.51422e-16	-1.59181	7.57111e-17
39	T23G5.1	rnr-1	-3.2871	4.88805e-42			-3.2871	4.88805e-42
408	C03C10.3	rnr-2	-0.858631	7.11583e-07	-0.366897	0.00294322	-0.612764	0.00147196
385	ZK1290.3	rol-8	-1.52776	1.64865e-09	0.202767	0.0886854	-0.662496	0.0443427
35	C36B1.3	rpb-3	-3.03246	2.11929e-47	-3.72133	1.65077e-31	-3.37689	8.25386e-32
17	Y54E10B_159.c	rpb-7			-4.15292	8.95901e-80	-4.15292	8.95901e-80
213	F26F4.11	rpb-8	-1.62421	2.18985e-28	-0.740514	6.09728e-05	-1.18236	3.04864e-05
79	T22F3.4	rpl-11.1	-2.01662	4.08451e-35	-3.13305	8.90093e-44	-2.57483	2.04226e-35
316	C14B9.7	rpl-21	-0.789751	1.53039e-07			-0.789751	1.53039e-07
90	D1007.12	rpl-24.1	-3.87663	2.81624e-27	-0.832298	0.00676245	-2.35446	0.00338123
367	C03D6.8	rpl-24.2	-1.08354	2.6523e-12	-0.278836	0.00103934	-0.681187	0.000519668
222	F52B5.6	rpl-25.2	-0.338031	0.0176421	-1.95202	9.99949e-26	-1.14502	0.00882104
32	Y106G6H.3	rpl-30			-3.44961	2.89525e-70	-3.44961	2.89525e-70
407	C42C1.3	rpl-34	-0.61281	1.30452e-12			-0.61281	1.30452e-12
110	F37C12.4	rpl-36	-2.19442	1.54446e-62			-2.19442	1.54446e-62
251	C54C6.1	rpl-37	-1.44594	3.33842e-16	-0.557496	8.30628e-09	-1.00172	4.15314e-09
206	C06B8.8	rpl-38	-0.8541	8.98663e-11	-1.56307	8.73717e-31	-1.20858	4.49331e-11
119	C26F1.9	rpl-39			-2.08333	2.50021e-10	-2.08333	2.50021e-10
150	Y48B6A.2	rpl-43	-1.93303	5.55845e-14	-1.41713	9.22317e-12	-1.67508	4.63938e-12
212	C30C11.2	rpn-3	-1.18481	2.70311e-08			-1.18481	2.70311e-08
200	F49C12.8	rpn-7	-1.23916	2.18105e-07			-1.23916	2.18105e-07
18	C16A3.9	rps-13	-4.12474	5.93692e-64			-4.12474	5.93692e-64
1	F37C12.9	rps-14	-6.64517	1.60475e-76			-6.64517	1.60475e-76
14	F37C12.11	rps-21	-4.22931	1.16705e-75			-4.22931	1.16705e-75
30	F53A3.3	rps-22	-4.06338	2.61218e-40	-2.96184	3.46366e-49	-3.51261	1.30609e-40
355	K02B2.5	rps-25	-0.887134	2.20901e-09	-0.525632	1.57839e-05	-0.706383	7.89306e-06
271	F39B2.6	rps-26			-0.906465	1.04183e-16	-0.906465	1.04183e-16
92	Y41D4A_3613.a	rps-28	-2.35013	6.13373e-55			-2.35013	6.13373e-55
7	B0412.4	rps-29	-5.37897	8.90734e-41	-4.59408	7.70805e-56	-4.98653	4.45367e-41
151	C23G10.3	rps-3			-1.66315	1.70802e-27	-1.66315	1.70802e-27
37	ZC434.2	rps-7			-3.33081	5.53449e-69	-3.33081	5.53449e-69
80	F23F12.6	rpt-3	-2.55861	1.06186e-30			-2.55861	1.06186e-30
100	C15H11.9	rrbs-1	-2.0582	2.54418e-39	-2.46287	3.04372e-39	-2.26053	2.79395e-39
336	Y111B2D.h	rsp-3			-0.746504	1.73331e-07	-0.746504	1.73331e-07
152	C27H6.2	ruvb-1	-1.53264	1.22984e-17	-1.7913	9.01081e-33	-1.66197	6.14922e-18
414	T24F1.2	samp-1	-1.00065	1.96859e-12	-0.20174	0.07252	-0.601197	0.03626
141	C08B11.5	sap-49			-1.75392	8.52261e-43	-1.75392	8.52261e-43
47	C47E12.1	sars-1	-3.00917	8.25252e-40			-3.00917	8.25252e-40
20	K11D9.2	sca-1	-3.29947	1.05231e-73	-4.8722	5.72132e-68	-4.08583	2.86067e-68
84	F18E2.3	scc-3	-1.87981	8.18347e-36	-3.02902	1.3334e-42	-2.45441	4.09173e-36
411	F42A8.2	sdhb-1	-0.845294	0.000111719	-0.366871	0.000201718	-0.606082	0.000156718
125	T08A11.2	sftb-1	-2.2098	1.5062e-18	-1.78119	3.38323e-18	-1.99549	2.44471e-18
421	C38C10.2	slc-17.2	-0.588654	8.15753e-06	-0.597027	3.86028e-10	-0.592841	4.07896e-06
45	F43D9.3	sly-1	-3.10297	1.018e-72			-3.10297	1.018e-72
132	Y37E11A_93.e	smgl-2	-1.92184	1.53006e-09			-1.92184	1.53006e-09
40	D1014.3	snap-1	-3.26611	4.80776e-40			-3.26611	4.80776e-40
65	K02D10.5	snap-29	-2.76436	9.55782e-53			-2.76436	9.55782e-53
371	C06A8.2	snpc-1.1			-0.676187	2.59232e-10	-0.676187	2.59232e-10
81	Y49E10.15	snr-6	-2.51219	1.27557e-31			-2.51219	1.27557e-31
53	K08E4.1	spt-5	-2.9386	4.62904e-43	-2.9587	4.68513e-36	-2.94865	2.34257e-36
379	Y110A2A_1898.b	sqv-2	-1.01125	5.34924e-13	-0.323531	0.000209119	-0.667392	0.00010456
124	F54C9.2	stc-1			-2.00715	1.55023e-28	-2.00715	1.55023e-28
179	F25G6.2	symk-1	-2.32971	1.5561e-61	-0.485303	0.000162274	-1.40751	8.11371e-05
48	T04G9.4	T04G9.4	-3.22561	8.68805e-28	-2.78749	1.47584e-25	-3.00655	7.42266e-26
202	T06E6.1	T06E6.1	-1.26022	2.35383e-13	-1.18357	1.51422e-16	-1.22189	1.17767e-13
195	T08G11.4	T08G11.4	-1.2752	4.45623e-07	-1.24034	6.23691e-05	-1.25777	3.14074e-05
13	T13H5.4	T13H5.4			-4.26997	2.23357e-43	-4.26997	2.23357e-43
400	T20B12.3	T20B12.3	-0.660113	2.99711e-19	-0.581119	0.00153284	-0.620616	0.000766419
233	T23D8.3	T23D8.3			-1.09996	1.38083e-12	-1.09996	1.38083e-12
321	T24H10.1	T24H10.1	-0.900113	1.41328e-05	-0.658642	5.34852e-06	-0.779377	9.74067e-06
300	T24H10.4	T24H10.4	-1.24387	1.3811e-05	-0.412364	0.00382503	-0.828116	0.00191942
93	T26A8.4	T26A8.4	-1.80434	2.55217e-35	-2.80462	3.25977e-23	-2.30448	1.62989e-23
177	T26G10.1	T26G10.1	-0.498403	0.0112709	-2.35603	1.66555e-42	-1.42722	0.00563544
197	C01A2.5	tads-1	-1.81581	3.67604e-29	-0.683659	9.79106e-10	-1.24973	4.89553e-10
216	R119.6	taf-4			-1.17163	1.60298e-17	-1.17163	1.60298e-17
275	F30F8.8	taf-5	-0.329556	0.0308144	-1.47575	2.46955e-18	-0.902655	0.0154072
412	E02H1.3	tag-124	-0.755429	0.00180595	-0.45299	5.27953e-05	-0.604209	0.000929374
178	F54D8.2	tag-174			-1.41485	2.76685e-21	-1.41485	2.76685e-21
121	C47D12.6	tars-1	-2.49722	9.09102e-29	-1.57005	5.89985e-27	-2.03364	2.99538e-27
126	F26E4.8	tba-1	-2.53047	2.22517e-38	-1.42734	4.78711e-16	-1.9789	2.39355e-16
97	C47B2.3	tba-2	-2.28314	4.80907e-11			-2.28314	4.80907e-11
76	C28H8.11	tdo-2	-1.89757	3.74631e-50	-3.42888	4.05689e-42	-2.66322	2.02845e-42
133	Y63D3A.5	tfg-1	-1.94881	4.02951e-28	-1.8273	7.67238e-15	-1.88805	3.83619e-15
302	T02C12.3	tftc-5	-1.94806	9.86389e-19	0.311897	0.00157496	-0.818079	0.000787479
229	C16A3.8	thoc-2	-0.585289	5.14786e-11	-1.64413	9.81995e-29	-1.11471	2.57393e-11
144	F39H11.2	tlf-1	-1.99298	1.9205e-37	-1.42141	6.32586e-14	-1.7072	3.16293e-14
274	C07A9.3	tlk-1	-0.397332	0.000828476	-1.40998	4.4192e-27	-0.903658	0.000414238
140	ZK430.1	toe-1	-1.62677	8.44305e-16	-1.90475	6.06187e-37	-1.76576	4.22152e-16
305	M01A10.3	tom-1	-0.288703	0.0739758	-1.33576	3.57382e-25	-0.812229	0.0369879
276	K12D12.1	top-2	-1.33832	4.75221e-13	-0.461939	1.89837e-05	-0.900131	9.49187e-06
384	T04G9.5	trap-2	-0.715094	0.00304982	-0.610047	9.71825e-05	-0.66257	0.0015735
403	F46F11.9	trpp-8	-0.459995	0.0544755	-0.773624	9.48125e-05	-0.616809	0.0272852
417	D2013.9	ttll-12	-0.857155	0.0142444	-0.340336	0.0308811	-0.598745	0.0225627
402	C52B9.6	twk-28	-1.0262	3.89718e-05	-0.210841	0.0950022	-0.61852	0.0475206
171	Y47D3B.5	twk-31	-0.972254	1.28669e-24	-1.96266	3.03517e-52	-1.46745	6.43343e-25
170	Y116A8C.35	uaf-2			-1.49905	1.82283e-19	-1.49905	1.82283e-19
391	Y110A2A_1231.a	ubc-15	-1.52193	0.000450537	0.24244	0.0586682	-0.639745	0.0295594
70	H06I04.a	ubl-1	-3.9713	2.53518e-37	-1.4797	4.84329e-15	-2.7255	2.42165e-15
27	Y53G8B_1025.b	ubl-1	-3.64361	2.97137e-44			-3.64361	2.97137e-44
307	F35H8.6	ugt-58	-1.33253	4.18034e-09	-0.289759	0.0538063	-0.811145	0.0269031
395	C47E8.7	unc-112	-0.586348	5.02392e-09	-0.668346	3.00439e-07	-0.627347	1.52731e-07
184	ZK637.8	unc-32	-0.574664	3.61512e-07	-2.19403	3.14007e-58	-1.38435	1.80756e-07
232	ZC101.2	unc-52	-1.80347	1.23516e-23	-0.398517	0.000212005	-1.101	0.000106002
406	F09D1.1	usp-39	0.275294	0.0624273	-1.50252	3.17986e-23	-0.613612	0.0312136
168	T27A3.2	usp-5	-1.63608	3.97345e-09	-1.37444	3.34617e-12	-1.50526	1.9884e-09
156	E01B7.1	usp-50	-1.09715	6.00641e-24	-2.18161	5.37583e-34	-1.63938	3.0032e-24
289	R10E11.8	vha-1	-0.864266	0.00609106			-0.864266	0.00609106
72	F46F11.5	vha-10			-2.69672	4.17112e-45	-2.69672	4.17112e-45
161	Y38F2A_5743.f	vha-11	-1.85349	1.46301e-28	-1.40309	2.0161e-15	-1.62829	1.00805e-15
77	F20B6.2	vha-12			-2.65055	4.22023e-23	-2.65055	4.22023e-23
71	T14F9.1	vha-15			-2.7113	1.49405e-33	-2.7113	1.49405e-33
164	F49C12.13	vha-17	-1.57832	8.18088e-14			-1.57832	8.18088e-14
88	R10E11.2	vha-2	-2.37613	3.23599e-51			-2.37613	3.23599e-51
105	Y38F2A_5743.i	vha-3	-2.32659	4.40752e-34	-2.12699	1.20892e-26	-2.22679	6.04458e-27
267	F35H10.4	vha-5	-1.24767	1.039e-15	-0.595144	0.0298484	-0.921405	0.0149242
296	VW02B12L.1	vha-6			-0.845004	1.75318e-05	-0.845004	1.75318e-05
154	C17H12.14	vha-8	-1.54053	8.03312e-21	-1.76599	2.02207e-21	-1.65326	5.02759e-21
236	ZK970.4	vha-9			-1.06983	7.50928e-19	-1.06983	7.50928e-19
278	F08B1.1	vhp-1	-0.889232	1.1894e-06			-0.889232	1.1894e-06
363	R06F6.2	vps-11	-1.65949	6.88317e-14	0.271492	0.00155608	-0.693997	0.000778039
59	C37C3.3	vps-32.2	-2.26108	3.30677e-42	-3.49284	1.01248e-53	-2.87696	1.65338e-42
204	W02B8.2	W02B8.2			-1.21664	4.28437e-05	-1.21664	4.28437e-05
101	W03G1.5	W03G1.5	-1.09659	0.00022023	-3.41516	5.07905e-39	-2.25588	0.000110115
87	Y80D3A.a	wars-1	-1.58842	1.21395e-13	-3.20078	6.7575e-48	-2.3946	6.06975e-14
259	F28D1.1	wdr-46	-0.731138	4.13341e-05	-1.18173	8.54763e-13	-0.956435	2.0667e-05
215	Y53C12A.1	wee-1.3			-1.17686	4.07383e-17	-1.17686	4.07383e-17
227	C46C2.1	wnk-1	-0.891107	3.13428e-06	-1.34806	4.75412e-16	-1.11958	1.56714e-06
114	Y48G1A_54.b	xpo-2			-2.15248	2.18352e-44	-2.15248	2.18352e-44
99	Y48G1A_54.c	xpo-2	-2.29644	2.62008e-07	-2.25684	1.07303e-46	-2.27664	1.31004e-07
191	Y48B6A.3	xrn-2	-1.72871	1.58069e-13	-0.827814	2.4731e-09	-1.27826	1.23663e-09
264	Y17G7B.18a	Y17G7B.18a	-0.931398	3.83819e-08			-0.931398	3.83819e-08
304	Y39B6B.b	Y39B6B.b			-0.816136	1.21904e-10	-0.816136	1.21904e-10
208	Y39B6B.o	Y39B6B.o			-1.20248	1.85786e-17	-1.20248	1.85786e-17
103	Y41E3.11	Y41E3.11	-2.22927	9.44297e-16			-2.22927	9.44297e-16
253	Y47D3A.c	Y47D3A.c	-0.982925	1.19997e-09			-0.982925	1.19997e-09
330	Y48A6C.4	Y48A6C.4	-0.256213	0.022742	-1.25191	2.74558e-22	-0.754061	0.011371
211	Y48B6A.1	Y48B6A.1	-1.17605	5.67978e-09	-1.20514	6.85069e-09	-1.1906	6.26524e-09
373	Y48G10A.b	Y48G10A.b			-0.675219	5.31838e-10	-0.675219	5.31838e-10
380	Y48G1A_54.d	Y48G1A_54.d	-0.997714	0.00186251	-0.336262	0.00664065	-0.666988	0.00425158
162	Y53C12B.2	Y53C12B.2	-1.83161	2.69785e-13	-1.38799	9.49129e-27	-1.6098	1.34893e-13
228	Y54G11A.9	Y54G11A.9	-1.96581	2.68814e-05	-0.272765	0.0257497	-1.11929	0.0128883
246	Y61A9LA_75.a	Y61A9LA_75.a	-0.953476	9.65834e-09	-1.0837	2.52316e-16	-1.01859	4.82917e-09
180	Y63D3A.7	Y63D3A.7			-1.40562	4.28947e-34	-1.40562	4.28947e-34
239	F13E6.4	yap-1	-2.30846	7.85962e-21	0.211382	0.0576945	-1.04854	0.0288472
418	M03C11.5	ymel-1	-0.201715	0.0217635	-0.995558	5.14088e-11	-0.598636	0.0108818
349	ZK1010.2	ZK1010.2	-1.20007	5.36948e-11	-0.231414	0.0450763	-0.715742	0.0225382
372	ZK1127.4	ZK1127.4	-0.828879	1.06027e-05	-0.522184	0.000640408	-0.675532	0.000325505
319	ZK1127.5	ZK1127.5	-1.14959	1.49422e-08	-0.423371	0.00028349	-0.786481	0.000141753
198	ZK121.c	ZK121.c			-1.248	1.94035e-13	-1.248	1.94035e-13
410	ZK265.6	ZK265.6	-0.757966	4.86828e-07	-0.458895	0.000992876	-0.608431	0.000496681
218	ZK550.4	ZK550.4	-1.17016	7.50824e-17	-1.15221	8.58147e-15	-1.16118	4.32828e-15
308	W06H12.1	ztf-6	-1.88236	1.85844e-11	0.261297	0.0124358	-0.81053	0.00621788

## Sheet: phb-1RNAi - Increased UPRmt
Columna1	GeneID	Name	LFC 1st rep	P_val 1s rep	LFC 2st rep	P_val 2s rep	mean LFC	mean P_val
1	F33D4.4	F33D4.4			1.94644	4.73855e-12	1.94644	4.73855e-12
2	K08F11.4	yars-2	1.09581	3.33535e-09			1.09581	3.33535e-09
3	C49H3.3	C49H3.3	0.181329	0.0556328	1.93148	3.12692e-13	1.0564	0.0278164
4	C48A7.2	pitr-1	0.230717	0.0581089	1.86068	1.42113e-09	1.0457	0.0290544
5	T06C10.3	T06C10.3	0.184447	0.0388322	1.88118	1.28591e-10	1.03281	0.0194161
6	Y105E8C.d	ekl-4	1.02155	3.09444e-13	1.02202	7.61314e-06	1.02179	3.80657e-06
7	F49E8.1	nprl-2	0.204235	0.0132433	1.8028	3.14643e-09	1.00352	0.00662163
8	F27C1.2	F27C1.2	1.00163	0.000533367			1.00163	0.000533367
9	F21F8.2	asp-11	0.983972	1.08761e-07			0.983972	1.08761e-07
10	F33D4.5	mrpl-1	-0.225883	0.0113999	2.18768	1.15776e-16	0.980898	0.00569996
11	W09C5.8	W09C5.8	0.653935	1.54995e-05	1.25279	1.07902e-12	0.953364	7.74974e-06
12	C34B2.8	C34B2.8	0.808737	1.25878e-08	1.04527	7.49751e-15	0.927005	6.29389e-09
13	C33A12.1	C33A12.1	1.07918	1.28896e-06	0.747335	1.14211e-11	0.913259	6.44485e-07
14	Y56A3A.32	wah-1			0.913186	1.01935e-05	0.913186	1.01935e-05
15	W01A8.4	nuo-6	1.38709	9.17755e-16	0.421735	0.00255976	0.904414	0.00127988
16	C33H5.6	swd-2.1	0.261275	0.010786	1.53728	1.29642e-13	0.899278	0.00539298
17	C34D4.14	hecd-1	0.287691	0.00844881	1.50806	1.37046e-12	0.897877	0.0042244
18	T22D1.3	T22D1.3	0.20284	0.0338058	1.58455	2.1807e-12	0.893696	0.0169029
19	F26E4.9	cco-1	1.11529	2.08805e-12	0.660074	0.000739852	0.88768	0.000369926
20	F49E8.4	cdd-2	-0.234768	0.00174199	1.97013	3.56285e-08	0.867679	0.000871015
21	Y45G12B.1	nuo-5	1.1462	8.68206e-14	0.564022	7.65462e-05	0.855109	3.82731e-05
22	F32D1.2	hpo-18	1.36614	1.50857e-17	0.334459	0.0953677	0.850297	0.0476838
23	F20D12.3	bbs-2	0.315834	0.00181126	1.35107	2.87211e-06	0.833454	0.000907065
24	F59E12.13	fut-3	0.73918	9.79333e-07	0.909388	1.07477e-07	0.824284	5.43405e-07
25	Y56A3A.19	Y56A3A.19			0.816372	7.06283e-06	0.816372	7.06283e-06
26	R09E12.3	sti-1	0.882672	8.58284e-18	0.732705	2.20877e-05	0.807689	1.10438e-05
27	F58G4.1	myo-5	0.800223	1.00702e-11			0.800223	1.00702e-11
28	D2085.4	D2085.4	1.07848	9.56396e-06	0.503411	0.000389146	0.790946	0.000199355
29	F44E7.4	F44E7.4	0.959744	8.64035e-15	0.565771	0.00194539	0.762757	0.000972697
30	C37H5.8	hsp-6	0.760659	1.52754e-07			0.760659	1.52754e-07
31	R12C12.2	ran-5			0.739682	9.82592e-11	0.739682	9.82592e-11
32	Y111B2C.h	aakg-1			0.735425	0.00261656	0.735425	0.00261656
33	Y67D8A_381.a	mca-3	0.735386	9.34118e-06			0.735386	9.34118e-06
34	Y111B2D.i	spin-4			0.733598	7.99115e-07	0.733598	7.99115e-07
35	F21H12.6	tpp-2			0.725912	7.60739e-09	0.725912	7.60739e-09
36	C50F7.6	C50F7.6	-0.204952	0.0635201	1.64018	4.39809e-11	0.717615	0.03176
37	Y57G11C.12	nuo-3	0.823665	1.65878e-05	0.589965	0.000292959	0.706815	0.000154774
38	R13H8.1	daf-16	0.489828	4.93392e-05	0.90785	6.07494e-11	0.698839	2.46696e-05
39	F33D4.1	nhr-8	-0.453705	0.00325978	1.84721	1.117e-10	0.696752	0.00162989
40	C18E9.6	tomm-40	0.950481	1.00879e-05	0.439267	0.0109106	0.694874	0.00546037
41	Y54E10A_159.b	mrpl-17	0.580062	1.5636e-05	0.801521	2.97398e-13	0.690791	7.81798e-06
42	T02H6.11	T02H6.11	0.490904	1.50225e-05	0.886478	8.65655e-10	0.688691	7.51169e-06
43	Y41E3.11	Y41E3.11	0.899832	0.00105602	0.45956	0.0145265	0.679696	0.00779125
44	Y37D8A.18	mrps-10			0.677466	1.39088e-05	0.677466	1.39088e-05
45	Y37D8A.8	Y37D8A.8			0.677242	6.46288e-06	0.677242	6.46288e-06
46	C15F1.f	tra-2	0.77324	4.03207e-07	0.577492	9.71916e-05	0.675366	4.87974e-05
47	C33H5.10	tag-322	-0.382505	0.0104982	1.73223	7.00911e-12	0.674863	0.00524908
48	F15D3.6	F15D3.6			0.674201	1.15543e-11	0.674201	1.15543e-11
49	C06E4.3	C06E4.3	-0.291534	0.000240521	1.6371	2.4348e-08	0.672782	0.000120272
50	Y79H2A.4	Y79H2A.4	0.463528	0.0274726	0.874732	5.62244e-07	0.66913	0.0137366
51	Y52B11A.9	dxbp-1	0.839723	6.51496e-11	0.496187	1.36411e-08	0.667955	6.85312e-09
52	F10C1.5	dmd-5	0.575939	0.000274975	0.759527	5.7978e-11	0.667733	0.000137487
53	F38A6.3	hif-1	0.662559	2.20125e-08			0.662559	2.20125e-08
54	F56B3.8	mrpl-2	0.927491	1.60656e-07	0.388922	0.00723701	0.658207	0.00361858
55	C33H5.4	klp-10	-0.269379	0.0228213	1.57041	2.60353e-09	0.650518	0.0114106
56	T21B10.1	mrpl-50	0.768594	0.000232901	0.525999	0.00230212	0.647297	0.00126751
57	Y56A3A.17A	npp-16			0.646323	0.000140808	0.646323	0.000140808
58	W10D9.5	tomm-22	0.829482	1.15739e-06	0.461618	0.00348804	0.64555	0.0017446
59	ZK20.5	rpn-12	0.699814	7.66591e-07	0.585752	0.0109969	0.642783	0.00549881
60	K10B2.5	ani-2	0.599506	0.00016128	0.679722	6.36567e-09	0.639614	8.06434e-05
61	C53B7.4	asg-2	0.919916	1.32839e-06	0.354713	0.010109	0.637315	0.00505516
62	Y71G12A_187.b	lsm-6	0.586852	1.02546e-08	0.681329	6.28864e-07	0.634091	3.19559e-07
63	R05G6.7	vdac-1	-0.305614	0.000109961	1.57168	1.15718e-13	0.633031	5.49804e-05
64	Y56A3A.21	trap-4			0.631156	0.000573006	0.631156	0.000573006
65	F41E7.1	F41E7.1	0.669791	1.24544e-07	0.591122	0.00116511	0.630457	0.000582619
66	B0034.3	casy-1	0.453836	0.0122783	0.803294	7.45293e-09	0.628565	0.00613915
67	C18A3.6	rab-3	0.413042	0.000769043	0.843187	9.76999e-09	0.628114	0.000384526
68	Y49E10.23	cccp-1			0.624837	0.000297269	0.624837	0.000297269
69	R12C12.6	R12C12.6			0.624121	1.2549e-06	0.624121	1.2549e-06
70	F10E7.9	F10E7.9	0.802341	3.88642e-08	0.444093	7.25146e-08	0.623217	5.56894e-08
71	C02G6.2	C02G6.2	0.933536	1.91851e-15	0.308373	0.0300893	0.620954	0.0150446
72	C32D5.9	lgg-1	0.53372	2.59435e-07	0.706912	1.86168e-05	0.620316	9.43812e-06
73	H24G06.1	H24G06.1	0.615898	2.2855e-08			0.615898	2.2855e-08
74	Y38F2A_5743.a	tftc-1	0.778336	1.27989e-07	0.450987	4.68395e-06	0.614661	2.40597e-06
75	Y54G11A.8	ddl-3	0.699179	3.1837e-06	0.529787	1.21388e-05	0.614483	7.66126e-06
76	F59E12.7	npl-4.1	0.683341	0.00028349	0.538181	5.97476e-08	0.610761	0.000141775
77	Y43F4B.3	set-25			0.610567	6.08638e-06	0.610567	6.08638e-06
78	Y111B2D.h	rsp-3			0.609373	1.79066e-07	0.609373	1.79066e-07
79	Y48E1B.5	mrpl-37	0.454131	0.00154624	0.762713	1.4026e-06	0.608422	0.000773823
80	H12I13.a	fbf-1			0.607999	2.38877e-10	0.607999	2.38877e-10
81	F21H11.2	sax-2	0.695955	5.55098e-07	0.517271	0.00196172	0.606613	0.000981138
82	Y55F3B_743.b	mrpl-46	0.897394	4.13546e-08	0.312306	0.0655593	0.60485	0.0327797
83	C32D5.2	sma-6	0.528422	1.04162e-08	0.680831	2.63708e-06	0.604626	1.32375e-06
84	B0545.3	scl-23	0.602662	1.33091e-05			0.602662	1.33091e-05
85	Y55F3A_746.f	Y55F3A_746.f	0.815332	1.42527e-13	0.388792	0.001996	0.602062	0.000998
86	F59C6.7	che-13			0.600309	1.48393e-11	0.600309	1.48393e-11
87	T02G5.13	mmaa-1	0.777807	1.64797e-05	0.418352	0.000421898	0.598079	0.000219189
88	R06C1.3	wve-1			0.597648	1.2786e-06	0.597648	1.2786e-06
89	C30B5.4	C30B5.4	0.590073	4.27376e-06	0.604586	7.9808e-09	0.59733	2.14087e-06
90	F29C4.1	daf-1	0.867791	5.55479e-11	0.319326	0.041419	0.593558	0.0207095
91	F18F11.1	F18F11.1	0.980183	1.53893e-09	0.203546	0.0665999	0.591865	0.0332999
92	T23B12.3	mrps-2	0.687207	9.42562e-10	0.492823	0.0244018	0.590015	0.0122009
93	T20H4.5	T20H4.5	0.291151	0.00117437	0.888729	3.05383e-07	0.58994	0.000587338
94	Y49E10.4	Y49E10.4			0.588181	8.2392e-05	0.588181	8.2392e-05
95	Y53H1A.d	Y53H1A.d			0.586105	4.92749e-06	0.586105	4.92749e-06
96	F53C3.12	bcmo-2			0.582463	0.00059973	0.582463	0.00059973
97	T08H10.1	T08H10.1	0.890959	9.60138e-10	0.272274	0.0686459	0.581616	0.034323
98	B0222.9	gad-3	0.581194	6.01325e-08			0.581194	6.01325e-08
99	T05H4.13	alh-4	0.580882	0.0110504			0.580882	0.0110504
100	C33A11.2	C33A11.2			0.580726	0.000852874	0.580726	0.000852874
101	K03H9.2	col-75	0.575613	2.31487e-05	0.584981	4.50867e-05	0.580297	3.41177e-05
102	T01D1.2	etr-1	0.475157	1.57973e-06	0.685184	4.14203e-06	0.580171	2.86088e-06

## Sheet: daf-2;phb-1RNAi - Increased UPR
Columna1	GeneID	Name	LFC 1st rep	P_val 1s rep	LFC 2nd rep	P_val 2nd rep	mean LFC	mean P_val
1	F25H5.5	clsp-1	1.67336	7.83185e-20	2.13593	1.66121e-18	1.90464	8.69766e-19
2	ZK973.b	lpd-5			1.86348	4.84128e-08	1.86348	4.84128e-08
3	F30A10.10	usp-48	1.48904	2.45218e-14	2.02839	5.72771e-19	1.75872	1.22612e-14
4	M04C9.6	ppfr-1			1.57816	5.29014e-11	1.57816	5.29014e-11
5	R13H8.1	daf-16	1.20183	1.77519e-06	1.87624	6.88437e-10	1.53904	8.87939e-07
6	T21E3.1	egg-4			1.48696	1.15083e-11	1.48696	1.15083e-11
7	ZK858.1	gld-4			1.47495	6.71309e-13	1.47495	6.71309e-13
8	T03F1.2	coq-4			1.46908	7.69785e-08	1.46908	7.69785e-08
9	F14B4.1	F14B4.1			1.46479	2.63737e-20	1.46479	2.63737e-20
10	C41D11.3	C41D11.3			1.45822	7.33474e-07	1.45822	7.33474e-07
11	C17E4.11	mec-8			1.44452	5.4293e-17	1.44452	5.4293e-17
12	C17E4.3	marc-3			1.39093	4.9911e-13	1.39093	4.9911e-13
13	C49H3.10	xpo-3	1.25369	8.79028e-09	1.52429	0.00190878	1.38899	0.000954394
14	ZK973.i	anc-1			1.38296	3.61701e-09	1.38296	3.61701e-09
15	F55C7.7	unc-73			1.3788	1.71324e-12	1.3788	1.71324e-12
16	F25H5.6	mrpl-54			1.37053	4.86701e-08	1.37053	4.86701e-08
17	Y47D9A.g	Y47D9A.g			1.36931	6.7667e-10	1.36931	6.7667e-10
18	M04C9.5	dyf-5			1.35062	1.28566e-05	1.35062	1.28566e-05
19	F30A10.5	stl-1	1.23002	4.09449e-10	1.47009	2.24258e-10	1.35005	3.16853e-10
20	ZK973.a	ZK973.a			1.32647	7.06693e-16	1.32647	7.06693e-16
21	W09C5.8	W09C5.8			1.3245	2.76013e-10	1.3245	2.76013e-10
22	T08G11.1	T08G11.1	1.03496	4.35571e-16	1.61327	1.27318e-13	1.32412	6.38769e-14
23	E01A2.i	E01A2.i			1.32313	3.09515e-11	1.32313	3.09515e-11
24	Y45G12B.1	nuo-5	1.32195	1.87173e-12			1.32195	1.87173e-12
25	F28H1.4	F28H1.4			1.31202	1.5055e-08	1.31202	1.5055e-08
26	F29D10.4	hum-1			1.31017	2.95098e-07	1.31017	2.95098e-07
27	F46A9.6	mec-8			1.3083	0.000151603	1.3083	0.000151603
28	C12C8.1	hsp-70	1.08914	1.07704e-12	1.51688	3.31943e-06	1.30301	1.65971e-06
29	ZK973.c	ZK973.c			1.27842	6.28786e-09	1.27842	6.28786e-09
30	C43E11.8	exoc-7			1.25953	8.54763e-13	1.25953	8.54763e-13
31	T20F5.3	mrrf-1			1.25205	2.58655e-14	1.25205	2.58655e-14
32	C32E8.3	tppp-1			1.24274	1.10945e-09	1.24274	1.10945e-09
33	D1007.15	D1007.15			1.23851	1.04714e-08	1.23851	1.04714e-08
34	C18E3.5	C18E3.5			1.21657	6.92864e-07	1.21657	6.92864e-07
35	F59E12.13	fut-3			1.21621	8.49374e-15	1.21621	8.49374e-15
36	F59C6.5	F59C6.5	1.05527	1.68309e-08	1.37214	2.88496e-09	1.2137	9.85791e-09
37	F36A2.9	F36A2.9			1.20612	2.30943e-12	1.20612	2.30943e-12
38	T03F1.10	clec-53			1.2028	9.72408e-07	1.2028	9.72408e-07
39	C44E4.1	ubr-4			1.20238	6.46397e-13	1.20238	6.46397e-13
40	M04C9.1	M04C9.1	0.9373	5.17085e-09	1.46134	2.21685e-11	1.19932	2.59651e-09
41	E01A2.h	E01A2.h			1.19219	1.17663e-09	1.19219	1.17663e-09
42	C09H10.3	nuo-1	1.28596	8.28564e-11	1.09426	2.36905e-15	1.19011	4.14294e-11
43	C45G3.3	C45G3.3	0.983077	2.66169e-09	1.39274	7.15484e-12	1.18791	1.33442e-09
44	W10D5.1	mef-2	0.993487	9.70045e-10	1.3421	4.40328e-07	1.16779	2.20649e-07
45	F47B3.7	F47B3.7			1.16467	9.79492e-05	1.16467	9.79492e-05
46	C41D11.7	eri-7			1.15569	3.10072e-05	1.15569	3.10072e-05
47	ZK973.f	anc-1			1.15123	7.0121e-06	1.15123	7.0121e-06
48	C41G7.2	klp-16			1.14016	1.05111e-10	1.14016	1.05111e-10
49	T03F1.11	tfbm-1			1.12651	1.07698e-07	1.12651	1.07698e-07
50	ZK973.g	anc-1			1.12614	4.22819e-08	1.12614	4.22819e-08
51	T27A3.1	trak-1	1.77504	1.75185e-08	0.471559	0.000189569	1.1233	9.47932e-05
52	F30A10.4	F30A10.4	1.0542	1.01383e-10	1.1891	2.67664e-09	1.12165	1.38901e-09
53	T03F1.1	uba-5			1.12038	1.06165e-06	1.12038	1.06165e-06
54	C43E11.11	cogc-5			1.11932	0.000506453	1.11932	0.000506453
55	F36H2.2	ent-6	0.893311	3.13903e-07	1.33808	3.07223e-07	1.11569	3.10563e-07
56	C17E4.6	C17E4.6	0.905438	7.24848e-08	1.27778	1.00233e-12	1.09161	3.62429e-08
57	K09A9.5	gas-1	1.06466	3.08005e-14	1.11702	1.12442e-08	1.09084	5.6221e-09
58	Y47G6A_245.k	lpd-3			1.08554	1.53034e-14	1.08554	1.53034e-14
59	W10D9.5	tomm-22	1.19745	6.16683e-08	0.969369	3.95208e-08	1.08341	5.05946e-08
60	F26E4.9	cco-1			1.07826	2.17e-07	1.07826	2.17e-07
61	R05G6.10	R05G6.10	0.959962	2.42802e-05	1.19069	1.72929e-05	1.07533	2.07865e-05
62	K07A1.7	cri-1	0.884059	1.1798e-08	1.24131	1.39507e-10	1.06269	5.96875e-09
63	VF36H2L.1	aph-1	0.835103	5.29244e-06	1.28384	2.47161e-07	1.05947	2.7698e-06
64	ZK858.4	mel-26			1.05849	5.7018e-08	1.05849	5.7018e-08
65	F29D10.2	F29D10.2			1.05668	6.18807e-05	1.05668	6.18807e-05
66	F49E8.3	pam-1	0.474362	0.00576469	1.63229	5.7252e-05	1.05333	0.00291097
67	F53F4.10	F53F4.10	1.58101	7.89893e-14	0.505657	0.0583489	1.04333	0.0291745
68	T23B12.2	mrpl-4	1.31601	2.06589e-11	0.758657	0.000375883	1.03733	0.000187942
69	F26H9.8	uggt-2	0.807119	1.01935e-05	1.26724	3.88876e-16	1.03718	5.09673e-06
70	F10C1.5	dmd-5			1.03699	1.29176e-06	1.03699	1.29176e-06
71	C34D4.14	hecd-1	1.03436	4.30102e-07			1.03436	4.30102e-07
72	Y47D9A.f	scpl-3			1.03256	6.17652e-05	1.03256	6.17652e-05
73	F49E8.5	dif-1	0.601108	0.000214179	1.46198	0.00322139	1.03155	0.00171778
74	K07A1.3	K07A1.3	0.910035	3.70836e-11	1.14064	1.14117e-13	1.02534	1.85989e-11
75	M04C9.3	M04C9.3	0.794521	9.22999e-05	1.25166	2.27859e-12	1.02309	4.61499e-05
76	B0414.7	mtk-1	1.34634	3.91525e-05	0.68353	6.29301e-05	1.01494	5.10413e-05
77	F45E4.9	hmg-5	0.728993	2.38867e-09	1.29948	0.00477009	1.01423	0.00238505
78	H14N18.4	H14N18.4	1.01381	4.38009e-05			1.01381	4.38009e-05
79	Y57G11C.12	nuo-3	0.934454	1.36552e-09	1.07553	1.15082e-06	1.00499	5.76094e-07
80	F17C11.10	F17C11.10	1.0248	1.41068e-13	0.976855	1.7889e-15	1.00083	7.14283e-14
81	T06C10.3	T06C10.3	0.734999	3.3801e-08	1.25506	8.62707e-08	0.995028	6.00358e-08
82	F53F10.4	unc-108			0.993436	7.26491e-05	0.993436	7.26491e-05
83	W01A8.4	nuo-6	1.33538	2.31515e-09	0.643541	0.0283516	0.989462	0.0141758
84	C43E11.1	acin-1			0.988423	5.27785e-10	0.988423	5.27785e-10
85	T05F1.1	nra-2	0.815485	1.24609e-10	1.15987	2.92827e-10	0.987677	2.08718e-10
86	F36F2.1	F36F2.1	0.700221	9.14186e-06	1.24251	3.10423e-08	0.971367	4.58645e-06
87	F36H2.1	tat-5	0.556863	6.79172e-05	1.36526	4.70143e-13	0.961062	3.39586e-05
88	R12E2.13	R12E2.13			0.960384	0.00434475	0.960384	0.00434475
89	R13A1.4	unc-8	0.727634	2.64418e-07	1.18398	7.0054e-05	0.955808	3.51592e-05
90	ZK858.6	ZK858.6	0.754864	2.14547e-06	1.15303	9.20095e-12	0.953945	1.07274e-06
91	C36F7.4	rig-5	0.864465	7.53178e-08	1.03894	1.43563e-05	0.951703	7.21579e-06
92	C34D4.15	col-113	0.951377	3.28428e-07			0.951377	3.28428e-07
93	T22D1.4	ribo-1	0.488513	0.000162269	1.40801	5.58395e-06	0.948263	8.39267e-05
94	C41G7.1	smn-1	0.79831	9.01707e-10	1.06209	2.49138e-08	0.930199	1.29078e-08
95	R13A1.2	kcc-1	0.760692	6.71117e-06	1.09397	0.00130632	0.92733	0.000656515
96	C34D4.1	C34D4.1	0.581885	0.00329108	1.25694	0.000961246	0.919414	0.00212616
97	Y54E10A_159.b	mrpl-17			0.917873	2.24803e-12	0.917873	2.24803e-12
98	E01A2.f	let-504			0.912346	2.76029e-05	0.912346	2.76029e-05
99	F36A2.8	phip-1	0.458587	0.00140521	1.36484	8.83801e-17	0.911712	0.000702606
100	R05G6.6	glt-6	0.810472	1.47199e-07	1.01205	0.00179321	0.911261	0.00089668
101	F42H11.2	lem-3	0.823294	3.58323e-06	0.988452	2.51433e-06	0.905873	3.04878e-06
102	F20D12.3	bbs-2	0.818415	2.85481e-07	0.972816	0.0606711	0.895616	0.0303357
103	C33H5.18	cdgs-1	0.499019	0.000122598	1.29113	0.00316239	0.895072	0.0016425
104	K11B4.1	K11B4.1			0.8898	6.85822e-09	0.8898	6.85822e-09
105	H28G03.1	H28G03.1	1.18115	4.10934e-05	0.584449	0.000545771	0.882799	0.000293432
106	B0034.3	casy-1			0.876976	1.23492e-07	0.876976	1.23492e-07
107	C34D4.4	C34D4.4	0.989207	1.8629e-06	0.764042	0.0158318	0.876624	0.00791682
108	C41D7.2	ptr-3	0.722487	0.0235068	1.02991	2.0171e-08	0.8762	0.0117534
109	T27E9.1	ant-1.1	0.876087	4.87386e-05			0.876087	4.87386e-05
110	Y106G6E.6	csnk-1			0.876082	7.43266e-07	0.876082	7.43266e-07
111	F26H9.4	nmat-2	0.776686	1.31735e-10	0.974225	2.36116e-05	0.875455	1.18059e-05
112	F30A10.1	calm-1	0.61874	0.00447387	1.13167	2.76389e-08	0.875207	0.00223695
113	B0496.3	unc-82	0.629401	2.2454e-06	1.11924	8.90712e-07	0.874321	1.56806e-06
114	W06D4.6	rad-54	0.436994	0.0625223	1.29489	4.20401e-13	0.86594	0.0312611
115	H16D19.1	clec-13	0.863757	1.06634e-07			0.863757	1.06634e-07
116	F49E8.4	cdd-2	0.278654	0.012794	1.44418	1.95482e-07	0.861415	0.00639709
117	F08A8.2	acox-2	0.859428	2.44315e-06			0.859428	2.44315e-06
118	F36A2.2	F36A2.2	0.719741	5.42616e-09	0.997462	9.5838e-08	0.858602	5.06321e-08
119	VC5.4	mys-1	1.1711	4.45345e-07	0.53344	9.04444e-05	0.852268	4.54449e-05
120	F30A10.8	stn-1	0.617946	4.79397e-05	1.06976	0.000237317	0.843851	0.000142628
121	Y54E10B_159.b	mod-5			0.838412	1.19259e-11	0.838412	1.19259e-11
122	T08G11.3	T08G11.3	0.485593	0.0151985	1.18759	3.43453e-06	0.836593	0.00760098
123	K02D7.1	K02D7.1	0.955598	1.86439e-08	0.715333	1.62887e-07	0.835466	9.07654e-08
124	Y55F3B_743.b	mrpl-46	0.586867	6.20109e-05	1.07864	4.05604e-11	0.832754	3.10055e-05
125	W03F8.3	W03F8.3	1.04554	9.67105e-13	0.614749	4.13804e-05	0.830142	2.06902e-05
126	B0035.7	his-47	0.991664	3.39562e-14	0.663504	0.000186183	0.827584	9.30916e-05
127	F44E7.4	F44E7.4	1.18318	2.38038e-12	0.468777	1.69913e-07	0.82598	8.49577e-08
128	F46A9.4	skr-2	0.740184	3.39713e-09	0.888387	7.33144e-07	0.814285	3.68271e-07
129	D2085.4	D2085.4			0.814051	0.000768811	0.814051	0.000768811
130	H02I12.7	his-65	0.977009	1.21606e-06	0.648752	0.00347873	0.812881	0.00173997
131	C17E4.9	nkb-1	0.593617	4.04511e-05	1.03038	9.68279e-10	0.811999	2.0226e-05
132	T12B3.3	T12B3.3	0.444041	0.00125143	1.17896	4.89159e-05	0.811499	0.000650174
133	E01A2.d	let-504			0.81012	0.000151576	0.81012	0.000151576
134	Y34D9A_150.c	Y34D9A_150.c	1.16312	1.87841e-09	0.454625	0.000114228	0.80887	5.7115e-05
135	C06E4.6	C06E4.6	0.937245	2.30315e-08	0.676518	0.0164167	0.806881	0.00820834
136	F55G1.10	his-61	0.804258	9.51999e-05			0.804258	9.51999e-05
137	F33D4.4	F33D4.4			0.802495	0.0196009	0.802495	0.0196009
138	F36A2.13	ubr-5	0.539455	0.000233449	1.06454	2.21126e-07	0.801998	0.000116835
139	C25A1.11	aha-1			0.800668	3.01386e-07	0.800668	3.01386e-07
140	R05G6.8	plc-4	0.799643	4.4767e-13			0.799643	4.4767e-13
141	Y71H2_388.c	Y71H2_388.c			0.797004	1.10461e-05	0.797004	1.10461e-05
142	C48A7.1	egl-19	0.50447	0.0118955	1.08743	0.00078917	0.795949	0.00634234
143	F37C12.3	F37C12.3	0.799947	5.86403e-13	0.790725	0.000169817	0.795336	8.49085e-05
144	C50F7.10	klo-1	0.441847	0.00425495	1.14634	0.00576908	0.794093	0.00501201
145	C49H3.3	C49H3.3	0.391237	0.0125843	1.19664	6.4615e-05	0.793937	0.00632445
146	T07D10.2	ntr-1	0.793612	6.92834e-08			0.793612	6.92834e-08
147	C47B2.7	efsc-1	0.792534	3.51191e-06			0.792534	3.51191e-06
148	C49H3.6	C49H3.6	0.458283	1.44097e-05	1.12067	8.86465e-06	0.789478	1.16372e-05
149	C33H5.9	sec-10	0.620867	0.000296209	0.956429	0.000347402	0.788648	0.000321805
150	F49E8.1	nprl-2	0.788622	1.88975e-12			0.788622	1.88975e-12
151	C24G7.1	delm-2	0.421817	0.0997607	1.14576	1.3387e-05	0.783786	0.049887
152	C06A6.4	C06A6.4	0.782868	6.67779e-05			0.782868	6.67779e-05
153	Y40C5A.e	ocr-4	0.33857	0.0167243	1.2257	0.0234676	0.782135	0.020096
154	C54G4.8	cyc-1	0.930728	0.000470199	0.631753	0.000103274	0.78124	0.000286736
155	D1007.5	D1007.5			0.780092	0.000524759	0.780092	0.000524759
156	W04D2.5	mrps-11	1.26419	4.69037e-06	0.291858	0.079381	0.778022	0.0396929
157	F26F12.1	col-140	0.777265	1.34909e-05			0.777265	1.34909e-05
158	C02G6.1	C02G6.1	1.00481	1.65961e-09	0.544841	1.17616e-07	0.774828	5.96378e-08
159	F35D6.1	fem-1	1.1302	1.61352e-09	0.417995	0.0107465	0.774097	0.00537323
160	C50B8.3	nuaf-1	0.965994	1.45958e-12	0.581821	1.32512e-06	0.773908	6.62559e-07
161	T27F6.5	pars-2	0.77316	0.000276622			0.77316	0.000276622
162	C06E4.3	C06E4.3	0.882736	3.7483e-07	0.662449	0.023665	0.772593	0.0118327
163	F55H12.3	F55H12.3	0.437332	0.00114095	1.10665	1.19166e-08	0.771992	0.000570481
164	T23H4.2	nhr-69			0.769405	7.53956e-12	0.769405	7.53956e-12
165	F54E12.4	his-58	0.768015	2.78621e-06			0.768015	2.78621e-06
166	K04G7.4	nuo-4	0.443527	1.24749e-08	1.08771	1.93975e-05	0.765617	9.705e-06
167	F41H10.6	hda-6	1.10986	5.21199e-10	0.419503	0.00254682	0.764682	0.00127341
168	R05G6.5	R05G6.5	0.339357	0.0232913	1.17937	0.000417701	0.759363	0.0118545
169	Y76B12C_65.a	cpsf-1	0.782955	7.31399e-07	0.734491	0.00101651	0.758723	0.000508622
170	Y34D9A_151.a	spd-1			0.758357	1.84517e-07	0.758357	1.84517e-07
171	R06C7.6	R06C7.6			0.757867	2.44962e-05	0.757867	2.44962e-05
172	T07D3.7	alg-2			0.750808	0.0281624	0.750808	0.0281624
173	T25D3.2	mrpl-28			0.749435	2.70471e-07	0.749435	2.70471e-07
174	F32H2.1	snpc-4			0.749195	0.000267589	0.749195	0.000267589
175	C50F7.4	sucg-1	0.571073	2.27659e-07	0.921209	0.0240619	0.746141	0.0120311
176	C09H5.2	catp-3	0.660425	6.54075e-08	0.831492	1.7554e-07	0.745959	1.20474e-07
177	C02G6.2	C02G6.2	1.08464	1.54445e-07	0.40685	0.00375006	0.745743	0.00187511
178	Y48G1C_55.a	atm-1	0.77255	0.000817135	0.700113	3.69027e-05	0.736332	0.000427019
179	F55G1.2	his-59	0.588666	1.46122e-05	0.882451	0.000506916	0.735559	0.000260764
180	W06D4.1	hgo-1	0.433701	0.0651827	1.03177	2.96809e-11	0.732736	0.0325913
181	F32H5.1	F32H5.1	0.995295	5.83609e-06	0.469112	0.0138453	0.732204	0.00692557
182	H02I12.8	cyp-31A2	0.959847	2.15065e-06	0.496995	0.000341259	0.728421	0.000171705
183	C47F8.6	C47F8.6	0.728046	6.24478e-06			0.728046	6.24478e-06
184	C41D11.2	eif-3.H			0.727137	0.00465938	0.727137	0.00465938
185	F16A11.1	F16A11.1	0.725751	1.13629e-05			0.725751	1.13629e-05
186	T05H4.13	alh-4	1.05529	3.16897e-05	0.395011	8.60254e-05	0.725151	5.88575e-05
187	F28B12.3	vrk-1			0.724142	3.31553e-07	0.724142	3.31553e-07
188	ZK381.1	him-3	0.288508	0.0149597	1.15496	1.46843e-06	0.721732	0.00748059
189	H26D21.2	msh-2	0.595608	0.00843025	0.846087	7.67058e-06	0.720847	0.00421896
190	K07B1.4	K07B1.4	0.720361	1.45573e-09			0.720361	1.45573e-09
191	C33H5.14	ntp-1	0.609944	3.32425e-05	0.829728	0.00599933	0.719836	0.00301628
192	C16D9.6	C16D9.6	0.683737	6.4304e-09	0.755365	1.8043e-09	0.719551	4.11735e-09
193	ZC477.1	ssq-3	0.719171	2.67887e-09			0.719171	2.67887e-09
194	F15B10.2	drh-1	1.06509	4.46004e-08	0.368989	0.0915115	0.717038	0.0457558
195	ZK177.4	ZK177.4	1.05439	1.08969e-08	0.374994	0.000237413	0.714694	0.000118712
196	W09G12.7	W09G12.7	0.895951	3.20998e-11	0.531296	0.000451511	0.713624	0.000225755
197	F18F11.1	F18F11.1	0.808329	5.77844e-07	0.618726	1.45957e-06	0.713528	1.01871e-06
198	K07B1.3	ucp-4	0.532153	0.00053903	0.893623	9.6231e-06	0.712888	0.000274326
199	ZK112.2	ncl-1	1.09091	8.16173e-13	0.334688	0.00818961	0.712799	0.00409481
200	T10H9.3	syx-18	1.09023	3.32438e-10	0.333923	0.0171776	0.712079	0.00858879
201	K09H11.1	K09H11.1	0.873614	8.06736e-11	0.543472	0.000285214	0.708543	0.000142607
202	Y40B1B.8	slc-25A46			0.708484	4.3551e-05	0.708484	4.3551e-05
203	F01G4.6	F01G4.6	0.529207	1.97981e-06	0.884996	1.80675e-07	0.707101	1.08024e-06
204	C01A2.3	oxa-1			0.706697	9.27009e-06	0.706697	9.27009e-06
205	F35G12.10	asb-1	1.0653	2.1176e-08	0.347891	0.0240451	0.706597	0.0120226
206	F32H2.4	thoc-3	0.432572	0.040447	0.980572	1.60156e-08	0.706572	0.0202235
207	M88.1	ugt-62	1.1433	3.84774e-11	0.265811	0.0180916	0.704554	0.00904582
208	T20H4.5	T20H4.5	0.625041	2.95847e-07	0.783265	0.0725377	0.704153	0.036269
209	K01D12.6	K01D12.6	1.11901	6.19393e-11	0.283469	0.0340275	0.701241	0.0170137
210	C33H5.10	tag-322	0.863107	1.04013e-09	0.536419	0.0339236	0.699763	0.0169618
211	T12E12.4	drp-1	1.02367	6.1334e-10	0.373996	0.0242642	0.698832	0.0121321
212	C46A5.1	C46A5.1	0.384876	0.0376871	1.01279	0.00157817	0.69883	0.0196327
213	W06D4.4	prmt-7	0.693608	4.06348e-06			0.693608	4.06348e-06
214	C36F7.1	irx-1	0.486461	5.03588e-05	0.899545	0.000701671	0.693003	0.000376015
215	C33H5.8	C33H5.8	0.586882	0.00074486	0.793513	0.000801564	0.690197	0.000773212
216	R11G10.1	avr-15	0.688808	1.1215e-10			0.688808	1.1215e-10
217	Y47G6A_242.b	Y47G6A_242.b	0.895072	3.00216e-05	0.482301	0.0042184	0.688687	0.00212421
218	ZC250.2	ZC250.2	1.01921	2.98179e-07	0.350718	0.00295831	0.684963	0.0014793
219	Y71H2_388.f	Y71H2_388.f	1.03313	6.26242e-06	0.335187	0.0420785	0.684156	0.0210424
220	F25B4.2	peli-1	1.05702	1.82142e-07	0.304365	0.00697694	0.680693	0.00348856
221	T26A5.3	nduf-2.2	0.677294	1.08058e-05			0.677294	1.08058e-05
222	Y71F9A_270.a	Y71F9A_270.a			0.67383	0.000459925	0.67383	0.000459925
223	C25A1.1	C25A1.1			0.673556	9.62566e-05	0.673556	9.62566e-05
224	W06D4.5	snx-3	0.433921	0.000905993	0.908813	0.000179958	0.671367	0.000542975
225	H38K22.3	tag-131	1.03495	1.28622e-08	0.305086	0.0111137	0.670019	0.00555686
226	Y65B4B_11.a	wwp-1			0.666294	7.67859e-08	0.666294	7.67859e-08
227	F28C1.3	F28C1.3	0.732088	3.5526e-06	0.599424	0.000368355	0.665756	0.000185954
228	F28A10.10	acdh-9			0.660692	0.000397788	0.660692	0.000397788
229	R07C3.1	clec-43			0.660011	0.000466845	0.660011	0.000466845
230	B0240.1	rhr-2	0.656125	1.08005e-08			0.656125	1.08005e-08
231	Y48G1A_53.a	mbtr-1	0.649741	0.0881983	0.660371	1.50872e-05	0.655056	0.0441067
232	C25E10.5	C25E10.5	0.65303	2.30678e-07			0.65303	2.30678e-07
233	H38K22.1	evl-14	1.03727	7.47694e-08	0.266294	0.0887784	0.651782	0.0443892
234	F44A2.5	F44A2.5	0.651016	3.20138e-06			0.651016	3.20138e-06
235	F47F6.1	lin-42			0.646912	1.05203e-05	0.646912	1.05203e-05
236	C34E10.4	prx-10	0.980506	2.0171e-08	0.305301	0.0913882	0.642903	0.0456941
237	K07A9.2	cmk-1	0.642786	2.44722e-06			0.642786	2.44722e-06
238	R12C12.1	R12C12.1			0.642435	8.05689e-05	0.642435	8.05689e-05
239	D2013.5	eat-3			0.64157	0.0136686	0.64157	0.0136686
240	T14A8.1	ric-3	0.639493	0.000478848			0.639493	0.000478848
241	F55A3.6	F55A3.6			0.63817	1.00959e-07	0.63817	1.00959e-07
242	R06C1.3	wve-1			0.636658	2.36994e-06	0.636658	2.36994e-06
243	Y65B4B_10.e	wwp-1			0.634543	2.94122e-12	0.634543	2.94122e-12
244	T23H4.3	nas-5	0.587296	0.000504933	0.675651	5.96391e-08	0.631474	0.000252497
245	F43C1.3	zhit-2	0.754658	2.06413e-05	0.508276	5.92214e-06	0.631467	1.32817e-05
246	K03A11.3	ceh-28	0.858669	1.82955e-13	0.402625	3.98646e-05	0.630647	1.99323e-05
247	Y51H7C_255.b	cogc-4			0.629775	3.0998e-06	0.629775	3.0998e-06
248	C38D4.5	tag-325	0.903401	5.13894e-08	0.346936	0.00593702	0.625169	0.00296853
249	B0205.4	B0205.4			0.622261	4.33567e-08	0.622261	4.33567e-08
250	C50F7.6	C50F7.6	0.3242	0.0398422	0.918878	0.00283077	0.621539	0.0213365
251	R05G6.4	R05G6.4	0.572571	3.80522e-05	0.670467	0.0379701	0.621519	0.0190041
252	B0207.6	B0207.6	0.956544	0.00836267	0.286344	0.0396002	0.621444	0.0239814
253	F08G2.2	his-43	0.511137	0.0181483	0.726829	1.54961e-05	0.618983	0.00908188
254	F15B10.1	nstp-2	0.843026	1.03513e-08	0.390991	0.027984	0.617008	0.013992
255	T08H10.1	T08H10.1	0.561529	1.39897e-05	0.670511	0.00193101	0.61602	0.0009725
256	Y52B11A.2	impt-1			0.616015	2.70356e-08	0.616015	2.70356e-08
257	B0403.4	pdi-6	0.615326	4.74398e-09			0.615326	4.74398e-09
258	F42F12.3	F42F12.3	0.782541	1.47737e-13	0.44521	7.72875e-05	0.613875	3.86438e-05
259	C56A3.6	C56A3.6	0.953538	8.65147e-14	0.273141	0.00754521	0.61334	0.00377261
260	C18A3.4	osta-2	0.594515	4.58304e-05	0.632102	0.0146562	0.613308	0.00735102
261	Y34D9A_153.a	mrpl-38			0.613183	5.40031e-05	0.613183	5.40031e-05
262	Y51H7B_4.a	fgt-1			0.612698	1.61163e-09	0.612698	1.61163e-09
263	C24B5.3	ptr-1	0.612291	1.18563e-06			0.612291	1.18563e-06
264	C06G3.2	klp-18	0.228976	0.0283386	0.995531	9.20263e-05	0.612254	0.0142153
265	R01H2.6	ubc-18	0.496218	0.000575188	0.720614	0.00256419	0.608416	0.00156969
266	R144.3	mdt-11	0.960054	5.75051e-07	0.249133	0.0479905	0.604593	0.0239956
267	C14B9.2	C14B9.2	0.651799	6.12911e-06	0.555565	3.08525e-06	0.603682	4.60718e-06
268	F47G4.7	smd-1			0.603035	0.00104357	0.603035	0.00104357
269	C16C10.8	C16C10.8	0.825924	3.48997e-07	0.379364	0.000376082	0.602644	0.000188216
270	B0412.2	daf-7			0.602488	4.23188e-07	0.602488	4.23188e-07
271	F42C5.10	ifo-1	0.405323	0.00309857	0.795394	6.2568e-07	0.600359	0.0015496
272	W01A8.6	W01A8.6	0.600091	0.00191309			0.600091	0.00191309
273	C34B4.1	max-1	0.459899	1.9041e-06	0.740184	0.000462031	0.600041	0.000231968
274	C16C10.7	rnf-5	0.834519	5.11125e-06	0.357096	0.0334888	0.595807	0.016747
275	C46A5.9	hcf-1	0.294605	0.0444538	0.891056	0.000969722	0.592831	0.0227117
276	Y18D10A.17	car-1	0.754928	5.08933e-08	0.430097	0.0182655	0.592513	0.0091328
277	Y106G6E.4	Y106G6E.4			0.591223	2.54564e-06	0.591223	2.54564e-06
278	C17D12.2	unc-75			0.588992	1.18019e-05	0.588992	1.18019e-05
279	Y47G6A_245.g	rnp-6			0.5883	0.00019069	0.5883	0.00019069
280	D2024.3	elo-3	0.587729	3.94793e-05			0.587729	3.94793e-05
281	Y57G7A.10	alh-6			0.587528	4.18353e-07	0.587528	4.18353e-07
282	C54C8.5	glct-5	0.587152	0.00347873			0.587152	0.00347873
283	F55G1.3	his-62	0.586532	0.000289725			0.586532	0.000289725
284	T15B7.1	T15B7.1	0.651236	1.82777e-05	0.514186	6.79149e-05	0.582711	4.30963e-05
285	R11D1.8	rpl-28	0.797276	1.32023e-11	0.36787	0.013763	0.582573	0.00688148
286	F38E9.5	F38E9.5	0.806397	5.57033e-12	0.358434	4.64989e-05	0.582416	2.32495e-05
287	F26F12.7	let-418	0.549431	0.0010949	0.61388	1.64582e-06	0.581655	0.000548274
288	F55C5.5	tsfm-1	0.697852	0.00387748	0.464913	0.00425495	0.581383	0.00406621
289	F10G7.10	F10G7.10	0.845389	1.33778e-10	0.317327	0.000618296	0.581358	0.000309148
290	W09G3.1	W09G3.1			0.580824	1.48806e-05	0.580824	1.48806e-05
291	F58G4.1	myo-5	0.58013	5.73971e-10			0.58013	5.73971e-10
292	F32D8.5	F32D8.5	0.616601	6.44892e-08	0.543464	4.94468e-08	0.580033	5.6968e-08

## Sheet: Overlaps
	phb-1 DOWN	daf-2;phb-1 DOWN	phb-1 UP	daf-2;phb-1 UP
1	aars-2	acp-1	aakg-1	acdh-9				180	Down in both
2	acdh-1	acr-11	alh-4	acin-1				8	Down in phb-1 and up in daf-2;phb-1
3	acdh-3	act-2	ani-2	acox-2				3	Down in daf-2;phb-1 and up in phb-1
4	acn-1	agef-1	asg-2	aha-1				31	up in phb-1 and up in daf-2;phb-1
5	acr-11	alg-1	asp-11	alg-2				167	Down in phb-1 only
6	acs-1	apa-2	bbs-2	alh-6				236	Down in daf-2;phb-1 only
7	act-1	apg-1	bcmo-2	ant-1.1				68	Up in phb-1 only
8	act-2	aps-1	C02G6.2	aph-1				248	Up in daf-2;phb-1 only
9	act-3	aps-2	C06E4.3	asb-1
10	alg-1	aps-3	C30B5.4	atm-1
11	apg-1	arf-3	C33A11.2	avr-15
12	aph-1	arl-1	C33A12.1	B0205.4						Genes	Repeated	Total
13	apl-1	arp-1	C34B2.8	B0207.6					phb-1 DOWN	366	11	355
14	aps-1	arx-3	C49H3.3	C02G6.1					daf-2;phb-1 DOWN	427	8	419
15	arf-1.2	arx-5	C50F7.6	C06A6.4					phb-1 UP	102	0	102
16	arf-3	asm-3	casy-1	C06E4.6					daf-2;phb-1 UP	292	5	287
17	asp-17	aspm-1	cccp-1	C14B9.2
18	B0336.3	athp-2	cco-1	C16C10.8
19	B0511.6	B0261.1	cdd-2	C16D9.6
20	bag-1	B0334.3	che-13	C17E4.6
21	baz-2	B0336.3	col-75	C18E3.5
22	bli-1	B0511.6	D2085.4	C25A1.1
23	blmp-1	bus-8	daf-1	C25E10.5
24	bus-8	byn-1	daf-16	C33H5.8
25	C01F1.3	C01F1.3	ddl-3	C34D4.1
26	C05G5.5	C10H11.8	dmd-5	C34D4.4
27	C11H1.3	C14C10.5	dxbp-1	C41D11.3
28	C16A3.4	C16A3.4	ekl-4	C45G3.3
29	C16A3.6	C26D10.4	etr-1	C46A5.1
30	C30B5.6	C28F5.4	F10E7.9	C47F8.6
31	C37A2.7	C30B5.6	F15D3.6	C49H3.6
32	C37C3.2	C30F12.1	F18F11.1	C56A3.6
33	C39E9.11	C37A2.7	F27C1.2	calm-1
34	C50F2.3	C37H5.5	F33D4.4	car-1
35	C53H9.2	C46H3.3	F41E7.1	catp-3
36	calu-1	C47E12.7	F44E7.4	cdgs-1
37	cars-1	C53H9.2	fbf-1	ceh-28
38	cbl-1	cacn-1	fut-3	clec-13
39	cbp-1	calu-1	gad-3	clec-43
40	cct-1	camt-1	H24G06.1	clec-53
41	cct-2	capg-2	hecd-1	clsp-1
42	cct-4	cas-2	hif-1	cmk-1
43	cct-7	cbp-1	hpo-18	cogc-4
44	cct-8	cct-1	hsp-6	cogc-5
45	cdc-48.1	cct-2	klp-10	col-113
46	cdc-5L	cct-4	lgg-1	col-140
47	ced-6	cct-5	lsm-6	coq-4
48	che-1	cct-7	mca-3	cpsf-1
49	clec-53	cct-8	mmaa-1	cri-1
50	cmd-1	cdc-37	mrpl-1	csnk-1
51	cpsf-2	cdc-42	mrpl-17	cyc-1
52	cye-1	cdc-48.1	mrpl-2	cyp-31A2
53	cyl-1	cdc-7	mrpl-37	D1007.15
54	cyp-42A1	cdk-2	mrpl-46	D1007.5
55	cyp-42A1	cdt-1	mrpl-50	daf-7
56	D2085.3	ced-6	mrps-10	delm-2
57	dars-1	ceh-6	mrps-2	dif-1
58	dhc-1	cel-1	myo-5	drh-1
59	dhs-4	cfim-2	nhr-8	drp-1
60	dis-3	chp-1	npl-4.1	dyf-5
61	dpf-3	cir-1	npp-16	E01A2.h
62	dpy-3	ckb-2	nprl-2	E01A2.i
63	dpy-7	clec-149	nuo-3	eat-3
64	dyci-1	clec-8	nuo-5	efsc-1
65	E02D9.1	col-178	nuo-6	egg-4
66	eef-1A.2	cope-1	pitr-1	egl-19
67	eef-1B.1	cpd-1	R12C12.6	eif-3.H
68	eef-2	cpf-2	rab-3	elo-3
69	eftu-2	cpn-1	ran-5	ent-6
70	egl-45	cpsf-2	rpn-12	eri-7
71	eif-1	cpsf-4	rsp-3	evl-14
72	eif-3.B	crn-5	sax-2	exoc-7
73	eif-3.E	ctps-1	scl-23	F01G4.6
74	eif-3.F	cul-1	set-25	F10G7.10
75	eif-3.G	cyb-3	sma-6	F14B4.1
76	erfa-3	cyd-1	spin-4	F16A11.1
77	F09B12.3	cye-1	sti-1	F17C11.10
78	F10C2.4	cyl-1	swd-2.1	F28C1.3
79	F14E5.2	cyp-13A5	T02H6.11	F28H1.4
80	F18C12.3	cyp-42A1	T06C10.3	F29D10.2
81	F20D1.1	cyp-42A1	T08H10.1	F30A10.4
82	F26A3.1	D2085.3	T20H4.5	F32D8.5
83	F27D4.4	dcn-1	T22D1.3	F32H5.1
84	F37C12.1	dhs-4	tag-322	F36A2.2
85	F49C12.12	dic-1	tftc-1	F36A2.9
86	F53F4.11	did-2	tomm-22	F36F2.1
87	F55A3.3	dis-3	tomm-40	F37C12.3
88	F57B10.5	dnc-1	tpp-2	F38E9.5
89	F57B9.3	dpy-2	tra-2	F42F12.3
90	fan-1	dpy-23	trap-4	F44A2.5
91	fars-1	dpy-3	vdac-1	F47B3.7
92	fars-3	dpy-7	W09C5.8	F53F4.10
93	fib-1	dyci-1	wah-1	F55A3.6
94	ftt-2	dyn-1	wve-1	F55H12.3
95	gana-1	E02H1.1	Y37D8A.8	F59C6.5
96	gck-3	E02H1.2	Y41E3.11	fem-1
97	gfi-2	eef-1A.2	Y49E10.4	fgt-1
98	glp-4	eef-1G	Y53H1A.d	gas-1
99	glrx-21	eftu-2	Y55F3A_746.f	glct-5
100	gst-37	egl-15	Y56A3A.19	gld-4
101	haf-4	egl-9	Y79H2A.4	glt-6
102	haf-9	eif-1	yars-2	H14N18.4
103	hars-1	eif-3.E		H28G03.1
104	hda-3	eif-6		hcf-1
105	hel-1	emb-27		hda-6
106	hgrs-1	erfa-3		hgo-1
107	his-32	exos-7		him-3
108	his-34	F07A11.5		his-43
109	his-6	F10C2.4		his-47
110	hlh-34	F11A3.2		his-58
111	hmgs-1	F18C12.3		his-59
112	hpk-1	F20D12.2		his-61
113	hpo-11	F23B12.7		his-62
114	hxk-1	F27D4.4		his-65
115	iars-1	F30H5.3		hmg-5
116	icd-1	F37B12.3		hsp-70
117	icd-2	F37C12.1		hum-1
118	iff-2	F39H12.3		ifo-1
119	ifg-1	F43G9.12		impt-1
120	iftb-1	F44G4.1		irx-1
121	ikb-1	F47B7.2		K01D12.6
122	imb-3	F47F2.1		K02D7.1
123	inf-1	F49C12.12		K07A1.3
124	ins-17	F49C5.4		K07B1.4
125	K07C5.4	F53B7.3		K09H11.1
126	K11D2.4	F53F4.11		K11B4.1
127	K12H4.3	F55F8.9		kcc-1
128	kars-1	F57B9.3		klo-1
129	kin-10	fard-1		klp-16
130	kin-2	fars-1		klp-18
131	lag-1	fars-3		lem-3
132	let-607	fib-1		let-418
133	let-70	fkb-6		lin-42
134	let-711	ftt-2		lpd-3
135	let-716	gck-3		lpd-5
136	let-767	gcp-2.2		M04C9.1
137	let-92	gfi-2		M04C9.3
138	lin-41	glh-1		marc-3
139	lin-53	glp-4		max-1
140	lpd-7	glrx-21		mbtr-1
141	M03F8.3	gst-28		mdt-11
142	M28.5	guk-1		mef-2
143	mag-1	hars-1		mel-26
144	mau-2	hbl-1		mod-5
145	max-1	hda-5		mrpl-28
146	mcm-6	hgrs-1		mrpl-38
147	mdt-15	hif-1		mrpl-4
148	mdt-6	his-14		mrpl-54
149	mel-26	his-32		mrps-11
150	mig-38	hlh-16		mrrf-1
151	mlt-11	hmbx-1		msh-2
152	mog-5	hmg-4		mtk-1
153	mrpl-54	hmgr-1		mys-1
154	mrps-17	hmgs-1		nas-5
155	mup-4	hpo-20		ncl-1
156	nap-1	hpo-21		nduf-2.2
157	nars-1	hrp-1		nhr-69
158	nath-10	hsf-1		nkb-1
159	ncbp-1	hsp-3		nmat-2
160	nekl-2	hst-2		nra-2
161	nhr-23	hst-3.1		nstp-2
162	nhr-25	iars-1		ntp-1
163	nog-1	icd-2		ntr-1
164	npp-10	icd-2		nuaf-1
165	npp-21	icln-1		nuo-1
166	npp-6	idh-2		nuo-4
167	npp-7	iff-2		ocr-4
168	npp-8	ifg-1		osta-2
169	npp-8	iftb-1		oxa-1
170	npp-8	ima-3		pam-1
171	npp-8	inf-1		pars-2
172	npp-8	inst-1		pdi-6
173	nsf-1	K07A1.9		peli-1
174	nst-1	K07C5.4		phip-1
175	obr-4	K10C3.4		plc-4
176	paa-1	K12H4.3		ppfr-1
177	pab-1	kars-1		prmt-7
178	pan-1	kle-2		prx-10
179	paqr-1	kqt-3		ptr-1
180	pars-1	let-23		ptr-3
181	pas-3	let-4		R05G6.10
182	pas-3	let-526		R05G6.4
183	pas-5	let-70		R05G6.5
184	pat-2	let-711		R06C7.6
185	pat-3	let-805		R12C12.1
186	pbs-1	let-92		R12E2.13
187	pbs-4	lgc-41		rad-54
188	pbs-6	lgc-46		rhr-2
189	pbs-7	lig-1		ribo-1
190	pcf-11	lin-35		ric-3
191	pdi-2	lin-53		rig-5
192	pept-1	lin-54		rnf-5
193	pfkb-1.2	lit-1		rnp-6
194	pha-4	lpd-2		rpl-28
195	plk-1	lpd-6		scpl-3
196	plrg-1	lpd-7		sec-10
197	prg-2	lpin-1		skr-2
198	pro-3	M05D6.2		slc-25A46
199	pros-1	M28.5		smd-1
200	prp-31	mag-1		smn-1
201	ptc-1	mat-1		snpc-4
202	ptc-3	max-2		snx-3
203	ptc-3	mcm-2		spd-1
204	ptc-3	mcm-6		ssq-3
205	ptr-4	mcm-7		stl-1
206	puf-7	mdt-15		stn-1
207	pyk-1	mdt-17		sucg-1
208	qars-1	mig-38		syx-18
209	qua-1	mks-3		T08G11.1
210	rab-5	mlt-11		T08G11.3
211	rad-54	mlt-3		T12B3.3
212	ran-1	mog-4		T15B7.1
213	ran-4	mua-6		tag-131
214	rbpl-1	mup-4		tag-325
215	rin-1	nap-1		tat-5
216	rla-2	nars-1		tfbm-1
217	rme-8	nath-10		thoc-3
218	rnp-4	ncbp-1		tppp-1
219	rnr-1	ncr-1		trak-1
220	rnr-2	ndx-7		tsfm-1
221	rpa-1	nekl-2		uba-5
222	rpb-3	nep-1		ubc-18
223	rpb-7	nhr-25		ubr-4
224	rpl-1	nhr-85		ubr-5
225	rpl-10	nhx-5		ucp-4
226	rpl-11.1	nipi-3		uggt-2
227	rpl-11.2	nmr-1		ugt-62
228	rpl-13	nog-1		unc-108
229	rpl-17	nol-1		unc-73
230	rpl-18	nol-5		unc-75
231	rpl-20	npp-1		unc-8
232	rpl-21	npp-11		unc-82
233	rpl-22	npp-21		usp-48
234	rpl-24.1	npp-8		vrk-1
235	rpl-25.2	npp-8		W01A8.6
236	rpl-30	nsf-1		W03F8.3
237	rpl-33	nst-1		W09G12.7
238	rpl-34	nsun-5		W09G3.1
239	rpl-35	nxt-1		xpo-3
240	rpl-36	pab-1		Y106G6E.4
241	rpl-36.A	pab-2		Y34D9A_150.c
242	rpl-37	pabp-2		Y47D9A.g
243	rpl-39	pan-1		Y47G6A_242.b
244	rpl-43	par-1		Y71F9A_270.a
245	rpl-6	pars-1		Y71H2_388.c
246	rpl-7A	pas-3		Y71H2_388.f
247	rpl-9	pas-3		ZC250.2
248	rpn-7	pcf-11		zhit-2
249	rpn-8	pdi-2		ZK177.4
250	rps-0	pgp-4		ZK858.6
251	rps-10	pha-4		ZK973.a
252	rps-11	pitr-6		ZK973.c
253	rps-13	plk-1		alh-4
254	rps-14	plrg-1		anc-1
255	rps-15	pole-2		anc-1
256	rps-18	poml-3		anc-1
257	rps-19	pop-1		bbs-2
258	rps-2	pri-1		C02G6.2
259	rps-20	pro-3		C06E4.3
260	rps-21	prp-31		C49H3.3
261	rps-22	prp-38		C50F7.6
262	rps-23	prp-6		casy-1
263	rps-24	prx-5		cco-1
264	rps-25	ptc-1		cdd-2
265	rps-26	ptc-3		D2085.4
266	rps-27	ptc-3		daf-16
267	rps-28	ptc-3		dmd-5
268	rps-29	ptr-4		F18F11.1
269	rps-3	pyp-1		F33D4.4
270	rps-5	qars-1		F44E7.4
271	rps-7	qua-1		fut-3
272	rps-8	R07G3.8		hecd-1
273	rps-9	R08D7.2		let-504
274	rpt-3	R09E10.5		let-504
275	rrbs-1	R166.2		mec-8
276	sams-4	rab-21		mec-8
277	sap-49	rab-7		mrpl-17
278	sars-1	rack-1		mrpl-46
279	scc-3	ran-3		myo-5
280	sec-12	rbpl-1		nprl-2
281	sftb-1	rbx-1		nuo-3
282	shw-1	rfp-1		nuo-5
283	skp-1	rha-2		nuo-6
284	skr-1	rla-2		T06C10.3
285	slc-17.2	rme-8		T08H10.1
286	sly-1	rnp-4		T20H4.5
287	smgl-2	rnr-1		tag-322
288	snap-1	rnr-2		tomm-22
289	snap-29	rol-8		W09C5.8
290	snr-1	rpb-3		wve-1
291	snr-2	rpb-7		wwp-1
292	snr-4	rpb-8		wwp-1
293	snr-5	rpl-11.1
294	snr-7	rpl-21
295	snrp-200	rpl-24.1
296	spt-5	rpl-24.2
297	srpa-68	rpl-25.2
298	suco-1	rpl-30
299	sup-17	rpl-34
300	symk-1	rpl-36
301	syx-18	rpl-37
302	syx-5	rpl-38
303	T01B7.8	rpl-39
304	T02G5.4	rpl-43
305	T13H5.4	rpn-3
306	T19A6.3	rpn-7
307	T22D1.2	rps-13
308	T25G3.1	rps-14
309	T26A8.4	rps-21
310	tars-1	rps-22
311	tba-1	rps-25
312	tba-2	rps-26
313	tdo-2	rps-28
314	teg-4	rps-29
315	tes-1	rps-3
316	tfg-1	rps-7
317	thoc-2	rpt-3
318	tlf-1	rrbs-1
319	toe-1	rsp-3
320	tom-1	ruvb-1
321	tre-2	samp-1
322	twk-31	sap-49
323	uaf-2	sars-1
324	ubl-1	sca-1
325	ubl-1	scc-3
326	ubl-1	sdhb-1
327	ubq-2	sftb-1
328	uggt-2	slc-17.2
329	ugt-24	sly-1
330	unc-44	smgl-2
331	unc-52	snap-1
332	usp-5	snap-29
333	vab-10	snpc-1.1
334	vha-1	snr-6
335	vha-10	spt-5
336	vha-11	sqv-2
337	vha-12	stc-1
338	vha-13	symk-1
339	vha-14	T04G9.4
340	vha-15	T06E6.1
341	vha-17	T08G11.4
342	vha-2	T13H5.4
343	vha-3	T20B12.3
344	vha-3	T23D8.3
345	vha-4	T24H10.1
346	vha-5	T24H10.4
347	vha-6	T26A8.4
348	vha-8	T26G10.1
349	vha-9	tads-1
350	vhp-1	taf-4
351	vps-32.1	taf-5
352	vps-4	tag-124
353	W01D2.1	tag-174
354	W02A11.1	tars-1
355	W03F8.2	tba-1
356	W03G1.5	tba-2
357	wars-1	tdo-2
358	Y43F8C.7	tfg-1
359	Y47D3A.c	tftc-5
360	Y50D4C_15.a	thoc-2
361	Y71H10B.1	tlf-1
362	ZC328.3	tlk-1
363	zen-4	toe-1
364	zer-1	tom-1
365	ZK121.c	top-2
366	ZK669.3	trap-2
367		trpp-8
368		ttll-12
369		twk-28
370		twk-31
371		uaf-2
372		ubc-15
373		ubl-1
374		ubl-1
375		ugt-58
376		unc-112
377		unc-32
378		unc-52
379		usp-39
380		usp-5
381		usp-50
382		vha-1
383		vha-10
384		vha-11
385		vha-12
386		vha-15
387		vha-17
388		vha-2
389		vha-3
390		vha-5
391		vha-6
392		vha-8
393		vha-9
394		vhp-1
395		vps-11
396		vps-32.2
397		W02B8.2
398		W03G1.5
399		wars-1
400		wdr-46
401		wee-1.3
402		wnk-1
403		xpo-2
404		xpo-2
405		xrn-2
406		Y17G7B.18a
407		Y39B6B.b
408		Y39B6B.o
409		Y41E3.11
410		Y47D3A.c
411		Y48A6C.4
412		Y48B6A.1
413		Y48G10A.b
414		Y48G1A_54.d
415		Y53C12B.2
416		Y54G11A.9
417		Y61A9LA_75.a
418		Y63D3A.7
419		yap-1
420		ymel-1
421		ZK1010.2
422		ZK1127.4
423		ZK1127.5
424		ZK121.c
425		ZK265.6
426		ZK550.4
427		ztf-6
