# Supplementary material for: Two conserved transcription factors and a histone deubiquitinase regulate the mitochondrial unfolded protein response and longevity interacting with insulin signalling
Source: Research Square preprint supplement (doi:10.21203/rs.3.rs-3337719/v2), 2025-12-15
Supplement: Supplementary file 3 [file 880f803ce8db33cc1b285c1a.xlsx]

## Sheet: S1e
		phb-1
		Mean	SD
N2	phb-1 + control	-2.3	0.6664
daf-2	phb-1 + control	-15.43	3.023

## Sheet: Fig. 2e and S5d
		F22B3.7		cyp14A4		F14F8.8		cest-8		atfs-1		dve-1
Genotype	Treatment	Mean	SD	Mean	SD	Mean	SD	Mean	SD	Mean	SD	Mean	SD
N2	znf-622 + control	2.634	1.484	-0.3382	0.7308	2.729	1.483	-0.3632	1.805	-0.2387	0.1043	-0.112	0.0865
N2	tlf-1 + control	1.385	0.3958	-0.9538	2.48	0.8063	1.503	-0.2065	1.983	0.7621	0.7262	-0.4692	0.192
N2	phb-1 + control	13.29	1.077	6.317	0.9567	4.175	1.151	2.156	0.822	0.8624	0.01747	0.2729	0.1934
N2	phb-1 + znf-622	10.83	0.9634	4.428	0.2592	2.659	1.165	0.755	0.2667	-0.0789	0.352	0.1838	0.6469
N2	phb-1 + tlf-1	11.08	0.3869	4.884	1.504	4.208	2.36	0.5366	0.4803	0.6784	0.4831	-0.1252	0.5861
daf-2	control + control	5.27	1.329	0.7025	0.9641	1.942	2.212	-0.2415	0.6521	0.2159	0.3658	0.7143	0.6662
daf-2	znf-622 + control	2.022	1.592	1.399	0.6825	1.936	2.007	1.769	2.195	-0.2432	0.6708	-0.6826	1.31
daf-2	tlf-1 + control	2.629	1.025	3.114	0.8381	1.249	0.2747	1.222	1.676	0.1479	0.5613	0.7808	1.865
daf-2	phb-1 + control	13.92	0.09586	9.164	0.4876	6.991	1.28	4.098	0.9996	1.405	0.8509	1.012	0.7506
daf-2	phb-1 + znf-622	9.555	0.6645	5.555	0.2534	3.862	1.435	3.468	1.994	1.53	2.062	2.872	0.8531
daf-2	phb-1 + tlf-1	9.526	1.425	7.685	0.3781	4.567	0.5372	3.326	1.17	0.8874	1.633	2.902	0.6188
		znf-622		tlf-1
		Mean	SD	Mean	SD
N2	dve-1 + control	0.04481	0.5121	-0.7232	0.9828
N2	atfs-1 + control	0.0366	0.1742	-0.1754	0.3116
N2	phb-1 + control	-0.0232	0.08156	-0.1174	0.102
N2	phb-1 + dve-1	0.398	0.6722	0.1901	0.2344
N2	phb-1 + atfs-1	0.9221	1.12	0.1453	0.2929
daf-2	control + control	-0.06307	0.07113	-0.3478	0.3925
daf-2	dve-1 + control	-0.129	0.1975	-0.8994	0.1956
daf-2	atfs-1 + control	0.08153	0.5057	-0.3383	0.5504
daf-2	phb-1 + control	0.1347	0.4376	-0.4657	0.1727
daf-2	phb-1 + dve-1	-0.309	0.1397	-0.5497	0.2141
daf-2	phb-1 + atfs-1	0.5229	0.2369	-0.5224	0.1696
		hsp-6
		Mean	SD
N2	phb-1 + control	0.8557	0.1919
N2	phb-1 + znf-622	0.1967	0.135
N2	phb-1 + tlf-1	0.4496	0.2138

## Sheet: Supp. Fig. 8
		znf-622		tlf-1		atfs-1		dve-1
Genotype	Treatment	Mean	SD	Mean	SD	Mean	SD	Mean	SD
N2	usp-48 + control	0.3965	0.8635	-0.4524	0.363	-0.05625	0.1051	-0.348	0.6174
N2	phb-1 + control	-0.0232	0.08156	-0.1174	0.102	0.8624	0.01747	0.2729	0.1934
N2	phb-1 + usp-48	-0.0129	0.1495	-0.1587	0.07987	0.2497	0.5238	0.3411	0.2612
daf-2	control + control	-0.06307	0.07113	-0.3478	0.3925	0.2159	0.3658	0.7143	0.6662
daf-2	usp-48 + control	-0.1169	0.3187	-0.6418	0.5127	0.1085	0.1951	0.9825	1.303
daf-2	phb-1 + control	0.1347	0.4376	-0.4657	0.1727	1.405	0.8509	1	0.7506
daf-2	phb-1 + usp-48	0.1071	0.3943	-0.5392	0.8208	0.7195	0.8695	2.006	1.397
usp-48	control + control	0.1802	0.2638	-0.8512	0.727	0.0479	0.2541	0.425	1.58
usp-48	phb-1 + control	0.8297	1.24	-0.3628	0.868	0.9906	0.07559	0.9533	1.262
		znf-622		tlf-1
		Mean	SD	Mean	SD
usp-48	control + control	0.1802	0.2638	-0.8512	0.727
usp-48	dve-1 + control	0.004733	0.2682	-0.83	0.3516
usp-48	atfs-1 + control	0.004733	0.2682	-0.83	0.3516
usp-48	phb-1 + control	0.8297	1.24	-0.3628	0.868
usp-48	phb-1 + dve-1	0.6974	0.4049	-0.7795	0.2577
usp-48	phb-1 + atfs-1	0.4822	0.7545	-0.5217	0.1465
		atfs-1		dve-1
		Mean	SD	Mean	SD
usp-48	control + control	0.0479	0.2541	0.425	1.58
usp-48	znf-622 + control	-0.0079	0.6136	0.7779	1.781
usp-48	tlf-1 + control	0.2905	0.6134	0.6696	1.918
usp-48	phb-1 + control	0.9906	0.07559	0.9533	1.262
usp-48	phb-1 + znf-622	0.0012	0.8946	0.4626	0.4589
usp-48	phb-1 + tlf-1	0.3471	0.6896	0.467	1.801
		usp-48
Genotype	Treatment	Mean	SD
N2	dve-1 + control	0.2123	0.6875
N2	atfs-1 + control	0.2248	0.6978
N2	znf-622 + control	-0.7909	0.7256
N2	tlf-1 + control	0.3534	0.5009
N2	phb-1 + control	0.3117	0.5112
N2	phb-1 + dve-1	-0.428	0.5686
N2	phb-1 + atfs-1	-0.0763	0.4978
N2	phb-1 + znf-622	-0.5122	0.4847
N2	phb-1 + tlf-1	-0.01383	0.3631
daf-2	control + control	-0.0285	0.1911
daf-2	dve-1 + control	0.06453	0.9443
daf-2	atfs-1 + control	0.3394	1.466
daf-2	znf-622 + control	-0.5297	0.4795
daf-2	tlf-1 + control	-0.3561	0.4185
daf-2	phb-1 + control	1.844	1.209
daf-2	phb-1 + dve-1	4.58	1.48
daf-2	phb-1 + atfs-1	2.275	1.023
daf-2	phb-1 + znf-622	1.077	0.2434
daf-2	phb-1 + tlf-1	0.0512	0.7752
